# Y-RNAs Lead an Endogenous Program of RIG-I Agonism Mobilized upon RNA Virus Infection and Targeted by HIV

Nicolas VABRET<sup>1,2,10</sup>, Valérie NAJBURG<sup>3</sup>, Alexander SOLOVYOV<sup>1,2,10,11</sup>, Petr ŠULC<sup>4</sup>, Sreekumar BALAN<sup>1,2,10</sup>, Guillaume BEAUCLAIR<sup>3</sup>, Maxime CHAZAL<sup>3</sup>, Hugo VARET<sup>5,6</sup>, Rachel LEGENDRE<sup>5,6</sup>, Odile SISMEIRO<sup>5</sup>, Raul Y. SANCHEZ DAVID<sup>3</sup>, Christopher McCLAIN<sup>1,2,10</sup>, Ramya GOPAL<sup>1,2,10</sup>, Lise CHAUVEAU<sup>7</sup>, Olivier SCHWARTZ<sup>7</sup>, Nolwenn JOUVENET<sup>3</sup>, Martin MARKOWITZ<sup>8</sup>, Frédéric TANGY<sup>3</sup>, Nina BHARDWAJ<sup>1,2,9,10,#</sup>, Benjamin D. GREENBAUM<sup>1,2,10,11,#</sup>, Anastasia V. KOMAROVA<sup>3,12,#</sup>

1. Tisch Cancer Institute, Icahn School of Medicine at Mount Sinai, New York, New York, USA. nicolas.vabret@mssm.edu
  2. Precision Immunology Institute, Icahn School of Medicine at Mount Sinai, New York, NY, 10029, USA.
  3. Viral Genomics and Vaccination Unit, Department of Virology, Institut Pasteur, CNRS UMR-3569, 75015 Paris, France.
  4. Center for Molecular Design and Biomimetics at the Biodesign Institute and School of Molecular Sciences, Arizona State University, Tempe, Arizona 85287, USA.
  5. Transcriptome and EpiGenome platform, BioMics, Center of Innovation and Technological Research, Institut Pasteur, 28 rue du Docteur Roux, 75724 Paris Cedex 15, France.
  6. Hub informatique et Biostatistique, Centre de Bioinformatique, Biostatistique et Biologie Intégrative (C3BI, USR 3756 IP-CNRS), Institut Pasteur, 28 Rue du Docteur Roux, 75724 Paris Cedex 15, France.
  7. Virus & Immunity Unit, Department of Virology, Institut Pasteur, CNRS UMR-3569, 75015 Paris, France.
  8. Aaron Diamond AIDS Research Center, The Rockefeller University, New York, NY, USA.
  9. Parker Institute of Cancer Immunotherapy, USA.
  10. Department of Medicine, Hematology and Medical Oncology, Department of Oncological Sciences, Department of Pathology, Center for Computational Immunology, Tisch Cancer Institute, Icahn School of Medicine at Mount Sinai, New York, NY, 10029, USA.
  11. Icahn Institute for Data Science and Genomic Technology, Icahn School of Medicine at Mount Sinai, New York, NY, 10029, USA. benjamin.greenbaum@mssm.edu
  12. Viral Genomics and Vaccination Unit, Department of Virology, Institut Pasteur, CNRS UMR-3569, 75015 Paris, France. anastasia.komarova@pasteur.fr
- # Shared senior authorship

34 **Abstract**

35 Pattern recognition receptors (PRRs) protect against host invasion by detecting specific  
36 molecular patterns found in pathogens and initiating an immune response. While  
37 microbial-derived PRR ligands have been extensively characterized, the contribution and  
38 relevance of endogenous ligands to PRR activation during viral infection remain  
39 overlooked. In this work, we characterize the landscape of endogenous ligands that  
40 engage RIG-I-like receptors (RLRs) upon infection by a positive-sense RNA virus, a  
41 negative-sense RNA virus or a retrovirus. We found that several endogenous RNAs  
42 transcribed by RNA polymerase 3 (Pol3) specifically engage RLRs, and in particular the  
43 family of small non-coding repeats Y-RNAs, which presents the highest affinity as RIG-I  
44 ligands. We show that this recognition is dependent on Y-RNA mimicking viral secondary  
45 structure and its 5'-triphosphate extremity. Further, we found that HIV-1 infection triggers  
46 a VPR-dependent downregulation of RNA triphosphatase DUSP11 *in vitro* and *in vivo*,  
47 leading to an increase of Y-RNA 5'-triphosphorylation that enables their immunogenicity.  
48 Importantly, we show that altering DUSP11 expression is sufficient to induce a type-I  
49 interferon and T cell activation transcriptional program associated with HIV-1 infection.  
50 Overall, our work uncovers the critical contribution of endogenous repeat RNAs ligands to  
51 antiviral immunity and demonstrates the role of this pathway in HIV-1 infection.

## 52 **Main**

53 Pattern Recognition Receptors (PRRs) were initially described as innate immune sensors  
54 of molecular patterns commonly found in pathogens but rarely, if ever, found in their hosts.  
55 In recent years, this view has been challenged by evidence that ligands originating from  
56 self can engage these same PRRs. Notably, sensing of self-RNA by innate receptors has  
57 been observed in various settings such as autoimmune disorders (1-3), tumorigenesis  
58 and cancer therapies (4-9) or infection by DNA viruses (10, 11). While the importance of  
59 endogenous ligands in priming immune responses is progressively uncovered, little is  
60 known about the breadth of biological processes in which they happen, nor about their  
61 functional and evolutionary interplay with immune sensors. Furthermore, we lack  
62 understanding of what features confers self-RNAs the ability to activate sensors and  
63 whether this is a general response to aberrant transcription or is dominated by specific  
64 RNA species.

65 Further confounding matters, we previously determined that conventional RNA  
66 sequencing approaches fail to capture the full spectrum of RNA expression in tumors (12).  
67 In particular, repetitive RNA, which can harbor immunostimulatory features (13), require  
68 further computational analysis for unbiased screening of their transcription. Here, we  
69 apply these approaches to identify novel RNA agonists of RIG-I-like receptors (RLRs).  
70 RLRs are a family of cytosolic RNA sensors composed of three members: RIG-I, LGP2  
71 and MDA5 (14). Their intracellular localization and proximity with host RNA species  
72 implies a delicate balance between a need to develop high affinity for microbial features  
73 and the possibility to encounter self-RNAs that display similar structures. However,  
74 despite a growing knowledge of the role of RLRs during RNA virus infection and the  
75 microbial-derived ligands they recognize (14), the contribution of specific endogenous  
76 RNAs to their activation and the mechanisms controlling their immunogenicity remain  
77 elusive.

## 78 **Y-RNAs and other RNA Pol3 transcripts are cellular RIG-I ligands** 79 **mobilized upon RNA virus infection**

80 We recently developed a riboproteomic approach based on tagged protein affinity  
81 purification that measures and compares receptor affinity of RNA molecules with improved

82 statistical evaluation of specific binding (15, 16). We performed an unbiased quantification  
83 of RLR-bound self RNAs during RNA virus infection. We generated human HEK293 (293)  
84 cells stably expressing the tagged-RLRs RIG-I, MDA5 or LGP2, or the protein Cherry as  
85 non-binding control. We infected each cell line with either positive-sense RNA virus  
86 Dengue Virus 4 (DV-4) or negative-sense RNA virus Measles Virus (MV). As a model of  
87 retroviral infection, we co-cultivated HIV-1-infected MT4 T cells with 293 cells  
88 overexpressing HIV-1 receptors CD4 and CXCR4 (293-4x4), as cell-free HIV-1 particles  
89 are poor stimulators of type I interferon (IFN-I) (17). We performed total RNA-sequencing  
90 on each RLR- or Cherry-purified fraction and on total cellular RNA (Fig. S1A). Importantly,  
91 we confirmed that the RLR-MAVS pathway is critical for sensing each viral infection in this  
92 model (Fig. 1A, Fig. S1B). We previously reported specific viral RNA-binding profiles on  
93 RLR compared to non-specific binding (Cherry) upon MV and DV-4 infections (15, 16)  
94 (Fig. S1C-D). However, upon HIV-1 infection, no enrichment of viral RNA was observed  
95 on any receptors (Fig. S1E). We then aligned RLR-bound RNAs to the human genome  
96 and measured specific cellular RNA enrichments in infected and non-infected conditions.  
97 Importantly, we found a strong enrichment of Pol3-transcribed RNAs to RIG-I and LGP2  
98 upon each RNA virus infection, and in particular Y-RNAs (Fig. 1B-C, Fig. S1F, S1H, Table  
99 S1). Y-RNAs constitute a family of highly conserved small noncoding RNAs transcribed  
100 by Pol3, composed of four canonical Y-RNA (RNY1, RNY3-5) and several hundreds of  
101 pseudogenes (18). As the repetitive nature of Y-RNAs makes it impossible to identify the  
102 exact origin of each transcript, we measured RLR enrichment of each repeat family rather  
103 than individual genes (Fig. 1D, S1G, S1I, Table S2). Specifically, the subfamily of HY4,  
104 which contains RNY4 and its pseudogenes, and to a lesser extent HY3, showed significant  
105 binding enrichment to RIG-I in the three RNA virus infections compared to non-infected  
106 conditions (NI).

## 107 **5'-PPP and a specific secondary structure are required for RNY4 RIG-I** 108 **agonist activity**

109 To analyze the immunostimulatory properties of Y-RNAs, we generated *in vitro*  
110 transcribed (IVT) molecules of each canonical Y-RNA and measured IFN-I signaling after  
111 stimulation of individual RLR knock-outs generated in the haploid cell line HAP1. Each

112 individual Y-RNA was able to elicit an IFN-I response after transfection, which was  
113 dependent on the presence of RIG-I and MAVS, but independent of MDA5 or to a large  
114 extent LGP2 (Fig. 2A). Further, as cellular Y-RNAs are observed under two different  
115 forms, a full-length form and shorter fragments derived from its 5' and 3' termini (18), we  
116 compared RNY4 reads coverage between the fraction bound to RIG-I and the fraction  
117 sequenced from the total cellular RNA pool in the different experimental infections  
118 settings. Interestingly, we did not find significant differences between RIG-I-bound RNAs  
119 and total cellular RNY4, and coverage results suggested that the uncleaved form of RNY4  
120 controls its RIG-I binding property (Fig. S2A). RIG-I recognizes RNA ligands based on a  
121 level of specificity in terms of sequence composition, length, double-stranded structures,  
122 and presence of triphosphate (-PPP) or diphosphate 5' moieties(14). We generated  
123 fragments derived from RNY4 missing specific molecular substructures (Fig. S2B). As  
124 shown in Fig. 2B, both 5'-PPP and stem S3 were required to confer upon RNY4 its RIG-I-  
125 dependent immunostimulatory activity.

126 To validate these findings, we synthesized IVT RNY4 and RNY4 $\Delta$ S3 RNAs using  
127 plasmids containing 3' ribozyme sequences that generate discrete 3' ends. We measured  
128 IFN-I response after transfection with these RNAs, confirming the difference observed  
129 earlier between RNY4 and RNY4 $\Delta$ S3 (Fig. S2C). Finally, to confirm that endogenously  
130 transcribed Y-RNAs can be immunostimulatory, we cloned the RNY4 sequence  
131 downstream of an RNA Pol3 promoter (U6) and used a Pol2 promoter (CMV) as control.  
132 Only endogenous transcription of RNY4 driven by RNA Pol3, but not when driven by Pol2,  
133 elicited an IFN-I response dependent on the RIG-I/MAVS pathway (Fig. 2C). To further  
134 understand the novel function of Y-RNAs as a RIG-I agonist, we created a secondary  
135 structure model of RNY4 and computed the probability of different sets of sequences of  
136 viral or human origins to fold along this model. Strikingly, RNY4-like structures were more  
137 often predicted in the 5' end of positive-sense RNA virus genomic sequences than in  
138 human RNA families, and specifically in sequences from *Flaviviridae* virus family (Fig.  
139 2D). Altogether, these results suggest that Y-RNAs from the subfamily HY4 display  
140 patterns of endogenous viral mimicry and can be mobilized as RIG-I agonists upon  
141 infection.

142 **DUSP11 modulates RNY4 5'-PPP and is downregulated by HIV-1 VPR**

143 As Y-RNAs are readily expressed at steady-state, we questioned what triggers their  
144 immunogenicity upon viral infection. Our results indicate that a 5'-PPP end is required for  
145 RNY4 RIG-I agonist activity. We performed a differential enzymatic digestion assay (Fig.  
146 S3A) to analyze the 5' structure of RNAs in HIV-1-infected Jurkat T cells. Surprisingly,  
147 HIV-1 infection induced a hyper triphosphorylation of RNY1 and RNY4 compared to non-  
148 infected cells (Fig. 3A). Every Pol3-transcribed RNA initially contains a 5'-PPP upon  
149 transcription that can be further edited by different cellular enzymes. Among these,  
150 DUSP11 is a protein from the dual-specificity phosphatase family that displays 5'-  
151 triphosphatase activity on several miRNA and other cellular noncoding RNAs (19, 20). We  
152 generated DUSP11 knock-out Jurkat cells to analyze its activity on Y-RNAs. Deletion of  
153 DUSP11 led to a notable increase in 5'-PPP levels at RNY4 5'-end compared to WT cells,  
154 as previous results suggested (20) (Fig. S3B, S3C). Further, infection with an HIV-1 NL4.3  
155 clone coding for GFP (HIV-GFP) led to profound DUSP11 downregulation in Jurkat and  
156 primary CD4 T cells (Fig. 3B-C). The predominantly nuclear localization of DUSP11 (21)  
157 and the rapid downregulation kinetics observed upon HIV-1 infection led us to hypothesize  
158 that HIV-1 viral protein R (VPR) could be responsible for the observed effect on DUSP11  
159 levels. *VPR* codes for a conserved accessory protein that incorporates into viral particles,  
160 has nuclear transport ability and induces the proteasomal degradation of several host cell  
161 factors (22). We compared DUSP11 downregulation in Jurkat T cells infected by either  
162 *WT* HIV-1 or the same clone lacking VPR (HIV $\Delta$ VPR). We found that VPR expression  
163 was required for HIV-1-induced DUSP11 downregulation (Fig. 3D). Concordantly,  
164 expression of *WT* VPR after transduction by lentiviral vectors, but not of a VPR(Q65R)  
165 mutant unable to recruit the DCAF1/DDB/Cul4 ligase complex (23), was sufficient to  
166 induce DUSP11 downregulation in Jurkat (Fig. S3D).

167 Since DUSP11 dephosphorylates the 5' end of putative endogenous RIG-I ligands, we  
168 analyzed whether DUSP11 deficiency was sufficient to trigger an innate immune response  
169 by performing total RNAseq on *WT* and DUSP11<sup>-/-</sup> Jurkat clones. A large fraction of  
170 differentially expressed genes were interferon-regulated genes, as annotated in the  
171 interferome database (24) (Fig. 3E). We further validated by qPCR the upregulation of  
172 genes from a panel of classical type-I ISGs (Fig. S3E). Additionally, we confirmed the  
173 upregulation of mRNAs coding for T cell surface markers involved in T cell activation and

174 survival such as CD28, CD38 or IL7R that we found differentially expressed by RNAseq  
175 (Fig. S3E). Finally, we defined a gene signature associated with DUSP11 deficiency in T  
176 cells composed of the top 100 most significantly upregulated genes (Table S3).

## 177 **DUSP11 downregulation and subsequent transcriptional response is** 178 **observed in HIV-1 infected patients**

179 To better characterize the relevance of DUSP11 in HIV-1 infection, we infected primary  
180 cells from 3 healthy donors with HIV-GFP, FACS-sorted the productively infected fraction  
181 (GFP+) and performed total RNAseq on GFP+ and GFP- fractions. We computed the  
182 DUSP11<sup>-/-</sup> signature established in Jurkat (Table S3) on HIV-1 infected cells (GFP+) and  
183 compared it to non-(productively) infected cells (GFP-). Importantly, the DUSP11<sup>-/-</sup>  
184 signature was sufficient to cluster both cell populations, independently of donor origin (Fig.  
185 4A). We next interrogated the presence of a transcriptional signature similar to that caused  
186 by DUSP11 deficiency in HIV-1 patients. In a cohort of HIV-1 positive (HIV+) patients, for  
187 which PBMCs were collected prior to and 6 months after antiretroviral treatment (ART)  
188 (Table S4)(25), we performed total RNAseq on CD4+ T cells from HIV+ patients prior to  
189 ART and also found that the DUSP11<sup>-/-</sup> gene signature was sufficient to cluster HIV+  
190 patients from non-infected controls (Fig. 4B). Moreover, DUSP11 protein levels were  
191 significantly increased in 5/6 patients after antiretroviral treatment (Fig. 4C), indicating a  
192 HIV-1-mediated downregulation of DUSP11 before ART. Altogether, these results  
193 suggest that HIV-1 VPR actively alters the innate immune transcriptional response of HIV-  
194 1 patients through the direct targeting of DUSP11, which functions as a mediator of  
195 immunostimulatory properties of endogenous RNAs.

## 196 **Discussion**

197 Here we describe the contribution of endogenous RNA sensing by RIG-I to innate immune  
198 responses elicited during RNA virus infection. In principle, any RNA transcribed by RNA  
199 Pol3 may have the ability to trigger RIG-I dependent immune responses, at least  
200 transiently, because they initially contain 5'-PPP terminal regions upon initiation of  
201 transcription. Indeed, a few of the Pol3-dependent RNAs, including RN7SL, RNA5S and  
202 vault-RNAs, have been shown thus far to trigger immune responses in different settings  
203 (1, 3, 6, 10, 11, 26, 27). In this work, we specifically identified the repeat family of Y-RNAs,

204 and in particular RNY4, as a model of endogenous RNAs whose unique structure confers  
205 a previously unknown function as RIG-I agonists. We observed a contribution of Y-RNAs  
206 in RLR signaling during infections by MV and DV-4, both RNA viruses replicating in the  
207 cytoplasm and producing RLR-specific viral RNA ligands (15, 16). MV and DV-4 are acute  
208 viral infections where the speed of host response is critical to halt and ultimately clear viral  
209 replication. We speculate that the viral-mimicking structure of these endogenous RLRs  
210 ligands licenses them to act as innate immune guardians that prime immune responses  
211 at the onset of cell infection.

212 We observed the same contribution of Y-RNAs during infection by HIV-1 where we failed  
213 to detect any ligand of viral origin to either RIG-I, or MDA5, or LGP2. Further, we identified  
214 the cellular triphosphatase DUSP11 as a key immune modulator that prevents  
215 unwarranted sensing of cellular RNAs in healthy cells. Importantly, we show that HIV-1  
216 has evolved mechanisms to manipulate and subvert this process through a targeted, VPR-  
217 dependent, degradation of DUSP11, leading to the subsequent activation of RIG-I by  
218 cellular RNAs (Fig. S4). While we cannot exclude that other functions associated with  
219 DUSP11, such as the maturation of miRNA (20, 21), might explain the selection forces  
220 leading to its targeting by HIV-1, we can also speculate that RLR activation by Y-RNAs  
221 may act as a rapid response mechanism for hosts to detect viruses that degrade DUSP11.  
222 Importantly, during the chronic phase of HIV-1 infection, higher levels of IFN-I signaling  
223 correlate with sustained levels of inflammation, immune exhaustion, CD4 T cell depletion  
224 and disease progression (28). In fact, chronic IFN-I signaling is considered by many as  
225 central to HIV-1 pathogenesis, to the point where the use of IFN-I blockade treatment is  
226 discussed as a supplement during ART (29). In this context, it will be important to  
227 determine whether, and to which extent, the immune activation subsequent to DUSP11  
228 downregulation participates to the disruption of immune system homeostasis observed in  
229 HIV-1-infected patients. Finally, our results emphasize the contribution of PRRs in sensing  
230 not only microbial ligands but also self-derived ligands. In the context of host-pathogen  
231 interactions, these endogenous ligands, possibly owing to their molecular mimicry of  
232 pathogen-associated features, constitute a new class of immunostimulatory molecules  
233 that provide the host the unique advantage to control both their potency and accessibility  
234 to innate sensors.



## 235 References

- 236 1. T. Hung *et al.*, The Ro60 autoantigen binds endogenous retroelements and  
237 regulates inflammatory gene expression. *Science* **350**, 455-459 (2015).
- 238 2. S. M. Lehmann *et al.*, An unconventional role for miRNA: let-7 activates Toll-like  
239 receptor 7 and causes neurodegeneration. *Nat Neurosci* **15**, 827-835 (2012).
- 240 3. K. Zhao *et al.*, LINE1 contributes to autoimmunity through both RIG-I- and MDA5-  
241 mediated RNA sensing pathways. *J Autoimmun* **90**, 105-115 (2018).
- 242 4. K. B. Chiappinelli *et al.*, Inhibiting DNA Methylation Causes an Interferon  
243 Response in Cancer via dsRNA Including Endogenous Retroviruses. *Cell* **169**,  
244 361 (2017).
- 245 5. J. J. Ishizuka *et al.*, Loss of ADAR1 in tumours overcomes resistance to immune  
246 checkpoint blockade. *Nature* **565**, 43-48 (2019).
- 247 6. B. Y. Nabet *et al.*, Exosome RNA Unshielding Couples Stromal Activation to  
248 Pattern Recognition Receptor Signaling in Cancer. *Cell* **170**, 352-366 e313  
249 (2017).
- 250 7. D. R. Ranoa *et al.*, Cancer therapies activate RIG-I-like receptor pathway through  
251 endogenous non-coding RNAs. *Oncotarget* **7**, 26496-26515 (2016).
- 252 8. D. Roulois *et al.*, DNA-Demethylating Agents Target Colorectal Cancer Cells by  
253 Inducing Viral Mimicry by Endogenous Transcripts. *Cell* **162**, 961-973 (2015).
- 254 9. A. Tanne *et al.*, Distinguishing the immunostimulatory properties of noncoding  
255 RNAs expressed in cancer cells. *P Natl Acad Sci USA* **112**, 15154-15159 (2015).
- 256 10. J. J. Chiang *et al.*, Viral unmasking of cellular 5S rRNA pseudogene transcripts  
257 induces RIG-I-mediated immunity. *Nat Immunol* **19**, 53-62 (2018).
- 258 11. Y. Zhao, X. Ye, W. Dunker, Y. Song, J. Karijovich, RIG-I like receptor sensing of  
259 host RNAs facilitates the cell-intrinsic immune response to KSHV infection. *Nat*  
260 *Commun* **9**, 4841 (2018).
- 261 12. A. Solovyov *et al.*, Global Cancer Transcriptome Quantifies Repeat Element  
262 Polarization between Immunotherapy Responsive and T Cell Suppressive  
263 Classes. *Cell Rep* **23**, 512-521 (2018).
- 264 13. N. Vabret, N. Bhardwaj, B. D. Greenbaum, Sequence-Specific Sensing of Nucleic  
265 Acids. *Trends Immunol* **38**, 53-65 (2017).
- 266 14. K. T. Chow, M. Gale, Jr., Y. M. Loo, RIG-I and Other RNA Sensors in Antiviral  
267 Immunity. *Annu Rev Immunol* **36**, 667-694 (2018).
- 268 15. M. Chazal *et al.*, RIG-I Recognizes the 5' Region of Dengue and Zika Virus  
269 Genomes. *Cell Rep* **24**, 320-328 (2018).
- 270 16. R. Y. Sanchez David *et al.*, Comparative analysis of viral RNA signatures on  
271 different RIG-I-like receptors. *Elife* **5**, e11275 (2016).
- 272 17. A. Lepelley *et al.*, Innate sensing of HIV-infected cells. *PLoS Pathog* **7**, e1001284  
273 (2011).
- 274 18. M. P. Kowalski, T. Krude, Functional roles of non-coding Y RNAs. *Int J Biochem*  
275 *Cell Biol* **66**, 20-29 (2015).
- 276 19. T. Deshpande, T. Takagi, L. Hao, S. Buratowski, H. Charbonneau, Human PIR1  
277 of the protein-tyrosine phosphatase superfamily has RNA 5'-triphosphatase and  
278 diphosphatase activities. *J Biol Chem* **274**, 16590-16594 (1999).

- 279 20. J. M. Burke, R. P. Kincaid, R. M. Nottingham, A. M. Lambowitz, C. S. Sullivan,  
280 DUSP11 activity on triphosphorylated transcripts promotes Argonaute association  
281 with noncanonical viral microRNAs and regulates steady-state levels of cellular  
282 noncoding RNAs. *Genes Dev* **30**, 2076-2092 (2016).
- 283 21. J. M. Burke, C. S. Sullivan, DUSP11 - An RNA phosphatase that regulates host  
284 and viral non-coding RNAs in mammalian cells. *RNA Biol* **14**, 1457-1465 (2017).
- 285 22. C. A. Guenzel, C. Herate, S. Benichou, HIV-1 Vpr-a still "enigmatic multitasker".  
286 *Front Microbiol* **5**, 127 (2014).
- 287 23. E. Le Rouzic *et al.*, HIV1 Vpr arrests the cell cycle by recruiting DCAF1/VprBP, a  
288 receptor of the Cul4-DDB1 ubiquitin ligase. *Cell Cycle* **6**, 182-188 (2007).
- 289 24. I. Rusinova *et al.*, Interferome v2.0: an updated database of annotated interferon-  
290 regulated genes. *Nucleic Acids Res* **41**, D1040-1046 (2013).
- 291 25. M. Markowitz *et al.*, A randomized open-label study of 3- versus 5-drug  
292 combination antiretroviral therapy in newly HIV-1-infected individuals. *J Acquir*  
293 *Immune Defic Syndr* **66**, 140-147 (2014).
- 294 26. F. Haderk *et al.*, Tumor-derived exosomes modulate PD-L1 expression in  
295 monocytes. *Sci Immunol* **2**, (2017).
- 296 27. K. I. Leonova *et al.*, p53 cooperates with DNA methylation and a suicidal  
297 interferon response to maintain epigenetic silencing of repeats and noncoding  
298 RNAs. *Proc Natl Acad Sci U S A* **110**, E89-98 (2013).
- 299 28. S. Moir, T. W. Chun, A. S. Fauci, Pathogenic mechanisms of HIV disease. *Annu*  
300 *Rev Pathol* **6**, 223-248 (2011).
- 301 29. S. G. Deeks, P. M. Odorizzi, R. P. Sekaly, The interferon paradox: can inhibiting  
302 an antiviral mechanism advance an HIV cure? *J Clin Invest* **127**, 103-105 (2017).

## 304 MATERIAL AND METHODS

### 305 Cells lines

306 HEK293 (293, ATCC CRL-1573) and HEK293T (293T, ATCC CRL-3216) cells were  
307 maintained in DMEM-Glutamax supplemented with 10% heat-inactivated fetal calf serum  
308 (FCS, ThermoFisher Scientific) and Penicillin-Streptomycin (PS, Life Technologies).  
309 Jurkat T cells (Gift from Brown laboratory, Mount Sinai), MT4C5 cells (a derivate MT4  
310 cells expressing CCR5) were used for co-culture with 293-4x4 and were cultured as  
311 described in (1). Primary T cells were maintained in RPMI supplemented with 5% pooled  
312 human serum (Gimini Bio-products) and HEPES buffer, non-essential amino acids, PS  
313 and L-glutamine (all Life Technologies). One-STrEP-tagged RLRs (ST-RLR: ST-RIG-I,  
314 ST-MDA5, ST-LGP2), CHERRY (ST-CH) cells (described in (2)) and STING-37 cell line  
315 corresponded to HEK293 cells stably transfected with an ISRE-luciferase reporter gene  
316 (described in (3)) were maintained in DMEM-Glutamax supplemented with 10% heat-  
317 inactivated FCS and 100 U/ml/100 mg/ml of PS and G418 (SIGMA) at 400 µg/ml. HAP1  
318 RIG-I ko., LGP2 ko., MDA5 ko., MAVS ko. And control cell lines were purchased from  
319 Horizon Discovery (cat# HZGHC001441c001, HZGHC002927c011, HZGHC001448c012,  
320 HZGHC001456c011 and C631, respectively) and maintained in Iscove's Modified  
321 Dulbecco's Medium (ThermoFisher Scientific) with 10% FCS and PS. In order to generate  
322 ST-RLR cells susceptible to HIV-1 infection, they were transduced with lentiviral vectors  
323 encoding HIV-1 receptor (CD4) and co-receptor (CXCR4). After transduction, cells were  
324 sorted for the high level of expression of both CD4 and CXCR4 receptors. These cell lines  
325 were assigned ST-RLR-4X4. Stable cell line (assigned ST-CH-4X4) expressing the  
326 Cherry protein instead of tagged RLRs was generated and used as a negative control to  
327 allow subtraction of non-specific RNA binding.

### 328 Generation of CRISPR-edited cell lines

329 293T knock out cell lines were generated by cotransfection (lipofectamine 2000,  
330 Invitrogen) of CRISPR-Cas9-expressing knockout plasmids (MAVS: sc-400769-ko-2,  
331 RIG-I: sc-400812, both Santa Cruz) and Homology Directed Repair plasmids containing  
332 puromycin resistance gene (MAVS: sc-400769-HDR-2, RIG-I: sc-400812-HDR, both  
333 Santa Cruz). The knockout plasmids are a mixture of three plasmids, each carrying a  
334 different guide RNA specific for the target gene, as well as the Cas- and GFP-coding  
335 regions. 72h after transfection cells were treated with puromycin (Invivogen, 1µg/ml) for 1  
336 week. 293 and 2934x4 knock-out clones were generated by transfection (lipofectamine  
337 2000, Invitrogen) of CRISPR-Cas9-expressing knockout plasmids (MAVS, sc-400769-ko-  
338 2 and control, sc-418922, both Santa Cruz). Jurkat knock-out clones were generated by  
339 electroporation (*Neon* Transfection System, Thermo Fisher Scientific) of CRISPR-Cas9-  
340 expressing knock-out plasmid (DUSP11, sc-408162; control, sc-418922, both Santa  
341 Cruz). 48h after transfection (293 & 2934x4) or electroporation (Jurkat), GFP<sup>+</sup> cells were  
342 selected by cell sorting, and single clones were isolated in 96-well plates then cultured for  
343 2 weeks. Depletion of target proteins was verified by western blotting.

### 344 Affinity chromatography of RLR-RNP complexes and RNA extraction.

345 ST-RLR cells were infected with MV (MOI=1) or DV-4 (MOI=0.5) for 24 hr or left uninfected  
346 (NI). In the case of HIV-1, ST-RLR4X4 (tagged) cells were co-cultivated with HIV-1-

347 infected cells MT4C5 cells as described in (1). Briefly,  $5 \cdot 10^7$  MT4C5 (donor cells) were  
348 exposed 150ng (equivalent p24) of HIV-1 NL4.3 for 2hr at 37°C. After washing the virus,  
349 the cells were grown for 48h. The infection was monitored by flow cytometry analysis by  
350 intracellular Gag staining. Infection was then performed via coculture of ST-RLR4X4 cells  
351 and MT4C5 cells at a donor:target cell ratio of 1:1. 24 h post infection, cells were lysed  
352 and affinity purification of ST-tagged proteins and RNA extraction was performed as  
353 described in (2, 4).

## 354 **Isolation of primary cells**

### 355 *Isolation of T cells from healthy donors*

356 PBMCs were prepared by Ficoll (GE Healthcare) gradient centrifugation from buffy coats  
357 received from New York blood center (Long island city, NY, USA). Buffy coats were diluted  
358 in 1:2 ratios (v/v) with PBS and 30 ml of the diluted buffy coats were loaded on 15 ml Ficoll  
359 in 50 ml falcon tubes. The tubes were centrifuged for 25 minutes at 2000 rpm at low  
360 acceleration and break. Mononuclear cells were collected and pooled from the tubes and  
361 washed twice by centrifuging. CD4+ T cell isolation was performed through beads-  
362 mediated negative selection (EasySep Human CD4+ T Cell Isolation Kit, Stemcell  
363 Technologies) and CD4+ cell purity was assessed by flow cytometry.

### 364 *Isolation of T cells from HIV-1 cohort patients*

365 Frozen PBMC from a cohort of intravenous drug using HIV-1+ patients (described in(5))  
366 were thawed at 37°C and dead cells were removed through Annexin V beads-mediated  
367 selection (EasySep Dead Cell Removal Annexin V Kit, Stemcell technology). CD4+ T cells  
368 were further isolated through beads-mediated negative selection (EasySep Human CD4+  
369 T cell Isolation Kit, Stemcell technology) and resuspended in Trizol (Ambion) (a small  
370 fraction was resuspended in PBS to check viability and purity by flow-cytometry). After  
371 addition of chloroform and phase separation, the top aqueous phase was used to  
372 subsequently isolate cellular RNA and the bottom organic phase was used to purify  
373 cellular proteins. Metadata of the cohort patients is listed in Table S5.

## 374 ***In vitro* transcription**

375 *In vitro* transcribed (IVT) RNAs were generated using T7 RiboMAX express large-scale  
376 RNA production system (Promega), using oligoDNA containing the sequence of interest  
377 behind a T7 promoter. For full-length Y-RNAs, dsDNAs covering the entire sequence were  
378 used as templates. For RNY4 substructures fragments, a single oligo corresponding to  
379 the specific cDNA sequence of interest was annealed to another sense oligo containing  
380 the T7 promoter sequence, generating a DNA molecule as template where only the T7  
381 promoter sequence was dsDNA. Sequences of DNA strands are listed in table S6 below,  
382 with T7 sequence in bold. T7 reaction mixed where then treated with DNase to remove  
383 DNA template and purified using RNeasy kit (Qiagen). When specified, IVT RNAs were  
384 additionally treated with Antarctic phosphatase (NEB) to remove their 5'-PPP moieties  
385 then repurified. When indicated, RNAs were also generated from *in vitro* transcription of  
386 a modified p2RZ plasmid (Addgene #27664) where RNY4 or RNY4ds3 sequences were  
387 cloned between T7 promoter and HDV Ribozyme sequences.

## 388 **Luciferase-based Reporter Assay**

389 *ISRE & IFN- $\beta$  promoter reporter assays.* 293T cells, 293, 293-4x4 or HAP1 cells were  
390 seeded in 24-well plates. 24h later, reporter plasmids p-ISRE-Fluc (containing 5 ISRE  
391 promoter sequences upstream of the Firefly luciferase gene) or pIFN $\beta$ -Fluc (containing  
392 the IFN- $\beta$  promoter upstream of the Firefly luciferase gene), and pTK-Rluc (containing a  
393 thymidine kinase promoter upstream of the Renilla luciferase gene) were transfected at a  
394 concentration of 100 ng/ml and 10 ng/ml, respectively. For experiments measuring  
395 responses to *in vitro* transcribed RNAs, plasmids were transfected together with 30 ng/ml  
396 of RNA of interest using Lipofectamine 2000 (Invitrogen). For experiments measuring  
397 responses to virus infection, cells were infected 24h later with MV (MOI 1) or DV-4 (MOI  
398 0.5), or co-cultured with MT4C5 infected with HIV-1 at a donor:target cell ratio of 1:1. 24h  
399 later cells were lysed (Passive Lysis buffer, Promega) and Firefly luciferase and Renilla  
400 Luciferase activities were measured using Dual Luciferase Reporter Assay system  
401 (Promega). Renilla values were used as transfection normalization control. Low molecular  
402 weight and high molecular weight poly(I:C) (Invivogen) were used as positive control of  
403 activation at a concentration of 5 and 30 ng/ml, respectively.

404 *STING-37 assay.* STING-37 cells, corresponding to HEK293 cells stably transfected with  
405 the ISRE-luciferase reporter gene (described in (3)) were plated in 24-well plates. 24h  
406 later, cells were transfected with 5-20 ng/well of *in vitro* transcribed RNA using  
407 lipofectamine 2000 (Invitrogen). 24h after transfection, cells were lysed (Passive Lysis  
408 buffer, Promega) and Firefly luciferase activity was measured using the Bright-Glo  
409 Luciferase Assay System (Promega).

#### 410 **Infection with virus / transduction with vector**

411 HIV<sub>NL4.3</sub>-GFP, HIV<sub>NL4.3</sub>WT and HIV<sub>NL4.3</sub> $\Delta$ VPR (described in(6, 7)) were freshly produced  
412 through transfection (Polyjet, Signagen) of 293T cells with plasmids coding for the full-  
413 length viral genomes. 3<sup>rd</sup> generation lentiviral vectors coding for ovalbumin (control) or  
414 VPR WT or a Q65R VPR mutant were produced through co-transfection of 293T cells with  
415 4 plasmids coding for Gag/Pol (Addgene #12251), Rev (Addgene #12253), VSVg  
416 (Addgene #12259), or one of the transgenes mentioned above (this article) at a molar  
417 ratio of 1/1/1/2.6. 48h after transfection, supernatants were collected, spun down and  
418 filtered to removed cellular debris and used to infect (HIV) or transduce (lentiviral vectors)  
419 T cell (Jurkat or Primary cells) by spinoculation in 96-wells plate (1,200 x g, 90 min at  
420 16°C) with polybrene (4  $\mu$ g/ml, EMD Millipore). 6h after infection / transduction,  
421 supernatants were replaced with fresh medium. In the case of primary cells, CD4 T cells  
422 were activated using PHA-L (2  $\mu$ g/ml) for 72h prior to infection.

423 When specified, HIV-GFP productively-infected cells were sorted based on the GFP  
424 expression on a FACS aria (BD biosciences) with biosafety cabinet facility. The cells were  
425 stained for CD3 and CD4 expression to identify CD4 T cell populations and CD8, CD14,  
426 CD19 and CD56 to identify other contaminating immune cell populations. Viable cells were  
427 discriminated with a viability dye (blue fluorescent dye, Thermofischer). CD3<sup>+</sup>CD4<sup>+/dim</sup>  
428 GFP<sup>+</sup> cells were sorted as infected and the CD3<sup>+</sup>CD4<sup>+</sup>GFP<sup>-</sup> cells were sorted as non-  
429 infected to the collection tube and used for RNA and protein isolation. The MV-Schwarz  
430 vaccine strain (GenBank accession no. AF266291.1) has been previously described<sup>(8)</sup>.  
431 DV-4 strain Dominica (AF326825)<sup>(9)</sup> was obtained from the Centro de Ingeniería Genética  
432 y Biotecnología (CIGB), Cuba.

## 433 **Differential 5'-PPP RNA digestion**

434 1ug of total cellular RNA was treated with RNA 5' polyphosphatase (enzyme that converts  
435 5'-triphosphorylated RNA into 5'-monophosphorylated RNA, Lucigen) for 30 min at 37°C  
436 or mock-treated. RNAs were then purified and treated with Terminator™ 5'-Phosphate-  
437 Dependent Exonuclease (processive 5' to 3' riboexonuclease that specifically digests  
438 RNA with 5'-monophosphate ends, Lucigen) for 90 min at 30°C or mock-treated. Resulting  
439 RNAs were then purified and processed for qPCR analysis.

## 440 **RNA purification**

441 Total cellular RNA was extracted using Trizol-Chloroform phase separation (Ambion)  
442 followed by RNA purification from the aqueous phase using a modified version of the  
443 Zymo RNA Clean and Concentrator (Zymo Research), through the addition of 2x volumes  
444 of ethanol to increase the retention of small RNA species. RNA was then subjected to  
445 DNase digestion (TURBO DNA-free Kit, Invitrogen) then purified again using Zymo RNA  
446 Clean and Concentrator and finally resuspended in DPEC-treated water.

## 447 **Quantitative PCR**

448 1ug of total RNA was converted to cDNA using RNA to cDNA EcoDry Premix Double  
449 Primed (Clontech) and resulting cDNA was diluted 10X in water. For differential enzymatic  
450 digestion analysis, qPCR reactions were carried out in 10 µl reaction volumes with 5 µl of  
451 TaqMan Fast Advanced Master Mix (Thermo Fisher Scientific), 2 µl of Primers/Probe mix  
452 and 3 µl of each cDNA sample. For all other analysis, qPCR reactions were carried out in  
453 10µl reaction volume with 5 µl iTaq Universal SYBR Green Supermix (Bio-rad), 2 µl Primer  
454 mix and 3 µl of each cDNA sample. The qPCR reactions were run using a CFX384 Touch  
455 Real-Time PCR Detection System (Bio-Rad) in clear wells plates. Targets amplification  
456 were quantified using the  $\Delta\Delta C_t$  method relative to  $\beta$ -actin. The list of the primers used in  
457 this study is provided in Table S7.

## 458 **Western Blotting**

459 Whole-cell lysates were resuspended in Laemmi sample buffer (Bio-rad) completed with  
460 10%  $\beta$ -mercaptoethanol and heated for 5 minutes at 95°C. 10-15ul of lysates were loaded  
461 onto 10% or 4-12% mini-protean TGX gels (Bio-rad) and the gel was run in  
462 Tris/Glycine/SDS buffer (Bio-rad). Proteins were transferred to 0.45 µm PVDF  
463 membranes (Immobilon) in Tris/Glycine buffer (Bio-rad) supplemented with 20%  
464 methanol. Membranes were blocked in Tris-buffered saline (Bio-rad) plus 0.1% Tween 20  
465 (Fisher) (TBS-T) containing 5% non-fat dry milk for 30 min at room temperature followed  
466 by overnight incubation with primary antibody at 4 °C. Membranes were then washed with  
467 TBS-T and incubated with HRP-conjugated secondary antibodies for 3 h at room  
468 temperature. Membranes were then washed and HRP was activated with ECL Plus  
469 Western Blotting Substrate (Pierce) for 5 minutes before being exposed to *CL-Xposure*  
470 *Film* (Thermo scientific). Relative HRP signals were quantified using image Lab software  
471 (Bio-rad), relative to GAPDH or Tubulin controls.

## 472 **Antibodies**

473 *Western Blot and Protein purification.*

474 The following antibodies were used: HIV-1 p24 (mouse monoclonal, Abcam, clone  
475 39/5.4A, #ab9071); MAVS (rabbit polyclonal, Cell Signaling Technology - CST, #3993);  
476 DUSP11 (rabbit polyclonal, Proteintech, #10204-2-AP);  $\alpha$ -tubulin (mouse monoclonal,  
477 Proteintech, clone 1E4C11, #66031-1-Ig); HIV-1 gp120 (sheep polyclonal, gift from  
478 Benjamin Chen laboratory); GFP (rabbit monoclonal, CST, clone D5.1, #2956); GAPDH  
479 (rabbit monoclonal, CST, clone 14C10, #2118); VPR (rabbit polyclonal, Proteintech, #  
480 51143-1-AP), StrEP-Tag (mouse monoclonal, Qiagen, #34850). Peroxidase-conjugated  
481 secondary antibodies against rabbit IgG (#7074) and mouse IgG (#7076) were purchased  
482 from CST.

#### 483 *Flow Cytometry*

484 The following antibodies were used: anti-p24-FITC (mouse monoclonal, Beckman and  
485 Coulter, #KC-57); anti-CD3-Pacific Blue (mouse monoclonal, Biolegend #300330); anti-  
486 CD4-PE (mouse monoclonal, Biolegend, #300539); anti-CD19-APC (mouse monoclonal,  
487 Biolegend #302212); anti-CD14-APC (mouse monoclonal, Biolegend, #325608); anti-  
488 CD56-APC (mouse monoclonal, Biolegend, #318310); anti-CD8-PerCP/Cy5.5 (mouse  
489 monoclonal, Bdbiosciences, #341051).

#### 490 **RNA-seq analysis of total and RLR-bound RNA**

491 Protocols for NGS library preparation and NGS of total and RLR-bound RNA from MV,  
492 DV-4-infected cells have been described in (2, 4). Before RNA-seq analysis of total and  
493 RLR-bound RNA from HIV-1- and mock-infected cells, depletion of ribosomal RNA was  
494 done using the riboZero reagents included in the TruSeq stranded total RNA library prep  
495 kit (#20020596, Illumina). NGS libraries were generated following the manufacturer's  
496 protocol. The indexed samples were multiplexed per 4 or 6 and sequenced on a  
497 HiSeq2500 sequencer (Illumina) to produce single-ends 65 bases reads, bearing strand  
498 specificity.

499 Bioinformatics analysis of NGS reads was performed using the RNA-seq pipeline from  
500 Sequana (10). Reads were cleaned of adapter sequences and low-quality sequences  
501 using cutadapt (11) version 1.11. Only sequences at least 25 nt in length were considered  
502 for further analysis. STAR version 2.5.0a (12) with default parameters, was used for  
503 alignment on the reference genome (Human genome hg19 from UCSC). Genes were  
504 counted using featureCounts version 1.4.6-p3(13) from Subreads package (parameters:  
505 -t gene -g ID -s 1). For statistical analysis of NGS data, count data were analyzed using  
506 R version 3.5.1 and the Bioconductor package DESeq2 version 1.20.0 (14). The  
507 normalization and dispersion estimation were performed with DESeq2 using the default  
508 parameters and statistical tests for differential expression were performed applying the  
509 independent filtering algorithm. For each virus, a generalized linear model including the  
510 replicate, beads and protein factors as well as the beads x protein interaction was set in  
511 order to test for the differential expression between the biological conditions. For each  
512 pairwise comparison, raw p-values were adjusted for multiple testing according to the  
513 Benjamini and Hochberg (BH) procedure (15) and genes with an adjusted p-value lower  
514 than 0.05 were considered differentially expressed. Bioinformatics analysis of NGS reads  
515 for viral reads was performed as described in (4). The MV-Schwarz vaccine strain  
516 (AF266291.1), DV-4 strain Dominica (AF326825) and HIV-1 NL4.3 (AF324493.2) were  
517 used as references.

## 518 **RNA seq analysis (others)**

519 Protocols for NGS library preparation of Ribo-depleted total cellular RNA were performed  
520 by Genewiz. Raw Illumina reads were trimmed using trim\_galore (Babraham  
521 bioinformatics) and cutadapt (11) version 1.18 with default settings. Reads were then  
522 mapped to the human genome (gencode annotation, build 38) and to rebase elements  
523 (release 20) using STAR aligner (12) version 2.6.1c. Aligned reads were assigned to  
524 genes using the featureCounts function of subread package using the annotation (16).  
525 This produced the raw read counts for each gene. Mapping and counting of the reads  
526 were done in two stages. First, reads were mapped to the human genome, and the counts  
527 were determined using the gencode annotation and the annotation derived from the  
528 repeatmasker output. Second, the reads which were not assigned to any feature in either  
529 gencode or repeatmasker annotation were re-aligned to the repeat consensus sequence  
530 (rebase). Counts obtained from repeatmasker and rebase corresponding to the same  
531 family were added together. Differential expression analysis was performed using  
532 DESeq2 package (14).

## 533 **Polymerase-III transcript annotation:**

534 Identification of regions of genome transcribed by polymerase-III (Pol3) remains a topic of  
535 active research (17, 18). In order to check if a given transcript is transcribed by Pol3 for  
536 our analysis, we created a curated list of tentative ncRNA transcripts that are likely  
537 transcribed by Pol3. In the list, we included all ncRNA families that are known to be  
538 transcribed by Pol3 (18) as well as ncRNA from hg19 genome assembly which overlap or  
539 are in proximity of an annotated Pol3 binding site or known Pol3 transcript, as based on  
540 curation of published datasets from Pol3 transcription studies from Refs (19-23).

## 541 **Modeling RNY4-like structure in transcripts:**

542 We follow the computational approach originally conceived in the work(24) to find Y-RNA  
543 homologs in genomes and used the RNAMotif tool to identify motifs that fold into a Y-RNA  
544 like structure. The RNAMotif software searches given RNA sequences for regions that are  
545 able to fold into a specified secondary structure. It identifies all regions in the RNA  
546 sequence capable of adopting the specified structure and calculates the free-energy  
547 contribution of the RNA region folded into the structure using the nearest-neighbor model  
548 for RNA(25). For our study, we use the following constraints for the “RNY4” structure  
549 search with RNAMotif. The motif is required to consist of (annotation illustrated as in Fig.  
550 S2B): stem (S1) of length ranging from 5 to 13 base pairs, a loop (L1) (with 0 to 2 unpaired  
551 nucleotides on 5’ side and 1 to 3 nucleotides on 3’ end side), followed by a stem (S2) of  
552 length from 7 up to 11 base pairs, with a loop (L2) of size 6 to 17 unpaired nucleotides on  
553 the 5’ end side and 6 to 17 nucleotides on the 3’-end side, and a stem (S3) of length 7 to  
554 17 base pairs, with a terminal hairpin loop of length ranging from 3 to 10 bases. In each  
555 stem, we allow up to 1 mismatch, and the stem base-pairs can contain both Watson-Crick  
556 and wobble base pairs. We only search for presence of the motif at the 5’ start of the  
557 transcripts, so for the evaluated sequences, we only consider the motif to be present if a  
558 possible RNY4 like structure (with assigned free energy by Turner model(25) smaller than  
559 0) is detected by RNAMotif within 6 bases from the 5’-end of the transcript.

560 The sequence datasets evaluated for RNY4 motif presence were the following: human  
561 cDNA and non-coding RNA sequences (from hg38 reference genome assembly),



562 complete genomes of positive-sense viruses with human host (Table S8, obtained from  
563 NCBI viral genome database(26)), and inserts in genome that were annotated as  
564 belonging to Y-RNA family in the repetitive DNA element database(27). For each  
565 sequence, we also constructed a scrambled sequence, which was obtained by randomly  
566 permuting all nucleotides in the respective sequence, so that the frequency distribution of  
567 respective nucleotides remains the same, but their order is random. The set of scrambled  
568 sequences was also used to search for RNY4-like motifs.

569 Table S5 – Metadata of HIV-1 cohort patient samples used in this study.  
570

| Sample              | Viral Load | CD4 Count |
|---------------------|------------|-----------|
| <b>HIV negative</b> |            |           |
| CTL1                | NI         |           |
| CTL2                | NI         |           |
| CTL3                | NI         |           |
| CTL4                | NI         |           |
| <b>HIV positive</b> |            |           |
| P1 Pre              | 1,060,000  | 460       |
| P1 Post             | <50        | 866       |
| P2 Pre              | 1,080,000  | 311       |
| P2 Post             | <50        | 1213      |
| P3 Pre              | 1,860,000  | 269       |
| P3 Post             | <50        | 602       |
| P4 Pre              | 120,000    | 355       |
| P4 Post             | <50        | 758       |
| P5 Pre              | 591,000    | 470       |
| P5 Post             | <50        | 866       |
| P6 Pre              | 525,000    | 503       |
| P6 Post             | <50        | 491       |
| P7 Pre              | 428,000    | 427       |
| P7 Post             | <50        | 487       |

571  
572 Table S6 – DNA template used for *in vitro* transcription  
573

|      | (+) strand                                                                                                                                         | (-) strand                                                                                                                                           |
|------|----------------------------------------------------------------------------------------------------------------------------------------------------|------------------------------------------------------------------------------------------------------------------------------------------------------|
| RNY1 | <b>TAATACGACTCACTATA</b> GGCTGGTCCGAGGTAGTG<br>AGTTATCTCAATTGATTGTTACAGTCAGTTACAGA<br>TCGAACTCCTTGTCTACTCTTTCCCCCTTCTCAC<br>TACTGCACCTTGACTAGTCTTT | AAAGACTAGTCAAGTGCAGTAGTGAGAAGGGGGAAAG<br>AGTAGAACAAGGAGTTCGATCTGTAACGACTGTGAAC<br>AATCAATTGAGATAACTCACTACCTTCGGACCAGCC <b>TA<br/>TAGTGAGTCGTATTA</b> |
| RNY3 | <b>TAATACGACTCACTATA</b> GGCTGGTCCGAGTGCAGTG<br>GTGTTTACAACCTAATTGATCACACCAGTTACAGAT<br>TTCTTTGTTCTTCTCCACTCCCCTGCTTCACTTG<br>ACTAGCCCTT           | AAAGGCTAGTCAAGTGAAGCAGTGGGAGTGGAGAAGGA<br>ACAAAGAAATCTGTAACGGTGTGATCAATTAGTTGT<br>AAACACCACTGCCTCGGACCAGCC <b>TATAGTGAGTCGT<br/>ATTA</b>             |
| RNY4 | <b>TAATACGACTCACTATA</b> GGCTGGTCCGAGGTAGTG<br>GGTTATCAGAACTTATTAACATTAGTGTCACTAAAG<br>TTGGTATACAACCCCTGCTAAATTTGACTGGC<br>TT                      | AAGCCAGTCAAATTTAGCAGTGGGGGTTGTATACCAA<br>CTTTAGTGACACTAATGTTAATAAGTTCTGATAACCA<br>CTACCATCGGACCAGCC <b>TATAGTGAGTCGTATTA</b>                         |
| RNY5 | <b>TAATACGACTCACTATA</b> GTTGGTCCGAGTGTGTGG<br>GTTATTGTTAAGTTGATTAAACATTGCTCCCCCA<br>CAACCGCGCTTGACTAGCTTGCTGTTT                                   | AAACAGCAAGCTAGTCAAGCGGGTGTGGGGGAGAC<br>AATGTTAAATCAACTTAAACAATAACCCACAACACTCGG<br>ACCAAC <b>TATAGTGAGTCGTATTA</b>                                    |

|              |                             |                                                                                                                                  |
|--------------|-----------------------------|----------------------------------------------------------------------------------------------------------------------------------|
| RNY4 dU      | <b>CAGTAATACGACTCACTATA</b> | AGCCAGTCAAATTTAGCAGTGGGGGGTTGTATACCAAC<br>TTTAGTGACACTAATGTTAATAAGTTCTGATAACCCAC<br>TACCATCGGACCAGCC <b>TATAGTGAGTCGTATTACTG</b> |
| RNY4 dL1     | <b>CAGTAATACGACTCACTATA</b> | AAAGCCAGTCAAAGCAGTGGGGGGTTGTATACCAACTT<br>TAGTGACACTAATGTTAATAAGTTCTGATAACCCACTA<br>CCTCGGACCAGCC <b>TATAGTGAGTCGTATTACTG</b>    |
| RNY4 dS1L1   | <b>CAGTAATACGACTCACTATA</b> | AAAGCAGTGGGGGGTTGTATACCAACTTTAGTGACACT<br>AATGTTAATAAGTTCTGATAACCCACTACCT <b>TATAGTGA<br/>GTCGTATTACTG</b>                       |
| RNY4 dS2L2S3 | <b>CAGTAATACGACTCACTATA</b> | AAAGCCAGTCAAATTTATCGGACCAGCC <b>TATAGTGAGT<br/>CGTATTACTG</b>                                                                    |
| RNY4 dL2S3   | <b>CAGTAATACGACTCACTATA</b> | AAAGCCAGTCAAATTTAGCAGTGGGGCGAACCCACTACC<br>ATCGGACCAGCC <b>TATAGTGAGTCGTATTACTG</b>                                              |
| RNY4 dS3     | <b>CAGTAATACGACTCACTATA</b> | AAAGCCAGTCAAATTTAGCAGTGGGGGGTTGTATAAGT<br>TCTGATAACCCACTACCATCGGACCAGCC <b>TATAGTGAG<br/>TCGTATTACTG</b>                         |

574  
575  
576

TABLE S7 – qPCR primers used in this study

|                   | FWD                                         | REV                      | Probe                             |
|-------------------|---------------------------------------------|--------------------------|-----------------------------------|
| <b>qPCR Probe</b> |                                             |                          |                                   |
| RNY1              | TGGTCCGAAGGTAGTGAGTTA                       | GTC AAGTGCAGTAGTGAGAAGG  | CACAGTCAGTTACAGATCGAACTCCTT<br>GT |
| RNY4              | GTCCGATGGTAGTGGGTTATC                       | AAAGCCAGTCAAATTTAGCAGT   | AGTGTCACTAAAGTTGGTATACAACCC       |
| RN7SL1            | AGGCTGGAGGATCGCTTGAGT                       | CCGGGAGGTCAACCATATTGATG  | TTCTGGGCTGTAGTGCGCTATGC           |
| U17b              | ACCCTGGGAGGTCACTCTC                         | CGAGGCCAGCTTCATCTTC      | CCAGGCTCTGTCCAAGTGGCATA           |
| <i>β-actin</i>    | Taqman Gene expression assay: Hs99999903_m1 |                          |                                   |
| <b>qPCR SYBR</b>  |                                             |                          |                                   |
| RNY1              | TGGTCCGAAGGTAGTGAGTTA                       | GTC AAGTGCAGTAGTGAGAAGG  |                                   |
| RNY4              | GTCCGATGGTAGTGGGTTATC                       | AAAGCCAGTCAAATTTAGCAGT   |                                   |
| <i>β-actin</i>    | CATGTACGTTGCTATCCAGGC                       | CTCCTTAATGTACGCACGAT     |                                   |
| DDx60             | CCCAGGGTCCAGGATTTTAT                        | GAACAGTTGCTGCCACTTGA     |                                   |
| EPST1             | GACAGAAGTGCTGTCAAAGTG                       | GCCGTTTCAGTTCAGTAATTC    |                                   |
| GBP1              | ACGACAGGGTCCAGTTGCTGA                       | TGCCTTTCGTGCTCTCATTTTCGT |                                   |
| HERC5             | ATGAGCTAAGACCCTGTTTGG                       | CCCAAATCAGAAACATAGGCAAG  |                                   |
| IFI44             | CCACCAGATGTCAGAAAGAG                        | TGGTACATGTGGCTTTGCTC     |                                   |
| IFI44L            | TCTGCCATTTATGTTGTGTGACA                     | CAGGTGTAATGGTTTACGGGAA   |                                   |
| IFI6              | GGTCTGCGATCCTGAATGGG                        | TCACTATCGAGATACTGTGGGT   |                                   |
| IFIT1             | TCTCAGAGGAGCCTGGCTAA                        | TGACATCTCAATGCTCCAG      |                                   |
| IFIT2             | AAGAGTGCAGCTGCCTGAA                         | GGCATTITTAGTTGCCGTAGG    |                                   |
| IFIT3             | GAACATGCTGACCAAGCAGA                        | CAGTTGTGTCCACCCTTCT      |                                   |
| IFIH1             | GGGGCATGGAGAATAACTCA                        | TGCCCATGTTGCTGTTATGT     |                                   |
| ISG15             | GAGAGGCAGCGAACTCATCT                        | CTTCAGCTCTGACACCGACA     |                                   |
| IRF7              | CAGAGTCTTCTTCCAAGAGCTG                      | TGCTATCCAGGGAAGACACA     |                                   |
| LAMP3             | CCTTCAAGTGCCTGAGTGAA                        | CCATAAGGCAGAGACCAACC     |                                   |
| LY6E              | TCTGTACTGCCTGAAGCCGA                        | CCACACCAACATTGACGCCT     |                                   |
| MX2               | AGCAGGAGATCACAACAGG                         | GGTAAGTCTTTCTGCCAGTCG    |                                   |
| OAS1              | TGCGCTCAGCTTCGTA CTGA                       | GGTGGAGA ACTCGCCCTCTT    |                                   |
| OASL              | CCATTGTGCCTGCCTACAGAG                       | CTTCAGCTTAGTTGGCCGATG    |                                   |
| RSAD2             | TGGTGAGGTTCTGCAAAGTAG                       | GTCACAGGAGATAGCAGAATG    |                                   |
| SIGLEC1           | CCACTAGGGCTGATACTGGCT                       | GAGGCGGGTGGTTGACTAC      |                                   |
| SPATS2L           | CAACGCTGCACCGTTTCTCTA                       | GACGAGCAGTCAGGATTTCCA    |                                   |
| IFN-β             | CTCTCCTGTTGTGCTTCTCC                        | GTCAAAGTTATCCTGTCTCTTG   |                                   |
| IL7R              | CTGGAGAAAGTGGCTATGCTC                       | ACATCTGGGTCCTCAAAGC      |                                   |
| CD28              | TTTCAGTTCCTCCACACTTC                        | CGACTGCTTCAACAAAATCTTG   |                                   |
| CD38              | CAGACTGGAGAAAGGACTGC                        | TTTACTGCGGGATCCATTGAG    |                                   |

577

## 578 **Acknowledgements**

579 NV would like to thank Alice Lepelley, Sarah Moyon and Miriam Merad for insightful  
580 discussions and suggestions. The authors would like to thank members of Tangy,  
581 Bhardwaj and Greenbaum labs for support and valuable discussions. We are grateful to  
582 Lisset Hermida and Gerardo Enrique Guillen Nieto (CIGB, Havana, Cuba) for providing  
583 DV-4 isolate and Namita Sajita and Benjamin Chen (Icahn school of Medicine at Mount  
584 Sinai, NYC, USA) for providing HIV-GFP clones and valuable technical help. VN and AK  
585 would like to thank Florence Guivel-benhassine (Virus and Immunity Laboratory of Institut  
586 Pasteur) and Commere Pierre-Henri (Plate-Forme de Cytométrie, IP) for technical  
587 support.

588 This work was supported by Agence Nationale de Recherches sur le SIDA et les hépatites  
589 virales 2012-1 and 2012-2 *HIV signature on RIG-I-like receptors* to AVK and FT; Agence  
590 Nationale pour la Recherche ANR-16-CE15-0025-01 *ViroStorm* to NJ and GB; Fondation  
591 pour la Recherche Medicale FDT20140931129 to RYSD, National Institutes of Health  
592 R01CA201189 and R01CA180913 to NB, R01AI081848 to NV, NB and BDG,  
593 7R01AI081848-04 and 1P30CA196521-01 to B.D.G. B.D.G. was supported by a Stand  
594 Up To Cancer - National Science Foundation - Lustgarten Foundation Convergence  
595 Dream Team Grant sponsored by Stand Up to Cancer, the Lustgarten Foundation, the V  
596 Foundation and the National Science Foundation (NSF 1545935). B.D.G. is The Pershing  
597 Square Sohn Prize-Mark Foundation Fellow supported by funding from The Mark  
598 Foundation for Cancer Research.

599

## 600 **Competing interests**

601 Icahn School of medicine has a patent related to this work (WO 2016/131048 AI) on which  
602 B.D.G. and NB are inventors. B.D.G. has received honoraria for speaking engagements  
603 from Merck, Bristol–Meyers Squibb, and Chugai Pharmaceuticals, and has consulted for  
604 PMV Pharma and Rome Therapeutics of which he is a cofounder. N.B. has received  
605 research funds from Cancer Research Institute, Merck, Regeneron, Novacure, Celldex,  
606 Ludwig Institute, Genentech, Oncovir, Melanoma Research Alliance, Leukemia &  
607 Lymphoma Society, NYSTEM and is on the advisory boards of Avidea, Check Point  
608 Diagnostics, Curevac, Prime-vax, Neon, Roche, Tempest Therapeutics, Novartis, Array  
609 BioPharm and is an extramural member researcher at Parker Institute for Cancer  
610 Immunotherapy.

611

## 612 **Supplementary References**

- 613
- 614 1. A. Lepelley *et al.*, Innate sensing of HIV-infected cells. *PLoS Pathog* **7**, e1001284  
615 (2011).
  - 616 2. R. Y. Sanchez David *et al.*, Comparative analysis of viral RNA signatures on  
617 different RIG-I-like receptors. *Elife* **5**, e11275 (2016).
  - 618 3. M. Lucas-Hourani *et al.*, Inhibition of pyrimidine biosynthesis pathway suppresses  
619 viral growth through innate immunity. *PLoS Pathog* **9**, e1003678 (2013).
  - 620 4. M. Chazal *et al.*, RIG-I Recognizes the 5' Region of Dengue and Zika Virus  
621 Genomes. *Cell Rep* **24**, 320-328 (2018).
  - 622 5. M. Markowitz *et al.*, A randomized open-label study of 3- versus 5-drug  
623 combination antiretroviral therapy in newly HIV-1-infected individuals. *J Acquir*  
624 *Immune Defic Syndr* **66**, 140-147 (2014).
  - 625 6. M. Laforge *et al.*, DRAM triggers lysosomal membrane permeabilization and cell  
626 death in CD4(+) T cells infected with HIV. *PLoS Pathog* **9**, e1003328 (2013).
  - 627 7. W. Hubner *et al.*, Quantitative 3D video microscopy of HIV transfer across T cell  
628 virological synapses. *Science* **323**, 1743-1747 (2009).
  - 629 8. C. Combredet *et al.*, A molecularly cloned Schwarz strain of measles virus  
630 vaccine induces strong immune responses in macaques and transgenic mice. *J*  
631 *Viro* **77**, 11546-11554 (2003).
  - 632 9. E. Mackow *et al.*, The nucleotide sequence of dengue type 4 virus: analysis of  
633 genes coding for nonstructural proteins. *Virology* **159**, 217-228 (1987).
  - 634 10. T. Cokelaer, D. Desvillechabrol, R. Legendre, M. Cardon, 'Sequana': a Set of  
635 Snakemake NGS pipelines. *The Journal of Open Source Software* **2(16)**, (2017).
  - 636 11. M. Martin, Cutadapt removes adapter sequences from high-throughput  
637 sequencing reads. *2011* **17**, 3 %J EMBnet.journal (2011).
  - 638 12. A. Dobin *et al.*, STAR: ultrafast universal RNA-seq aligner. *Bioinformatics* **29**, 15-  
639 21 (2013).
  - 640 13. Y. Liao, G. K. Smyth, W. Shi, featureCounts: an efficient general purpose  
641 program for assigning sequence reads to genomic features. *Bioinformatics* **30**,  
642 923-930 (2014).
  - 643 14. M. I. Love, W. Huber, S. Anders, Moderated estimation of fold change and  
644 dispersion for RNA-seq data with DESeq2. *Genome Biol* **15**, 550 (2014).
  - 645 15. Y. Benjamini, Y. Hochberg, Controlling the False Discovery Rate: A Practical and  
646 Powerful Approach to Multiple Testing. *Journal of the Royal Statistical Society.*  
647 *Series B (Methodological)* **57**, 289-300 (1995).
  - 648 16. Y. Liao, G. K. Smyth, W. Shi, The Subread aligner: fast, accurate and scalable  
649 read mapping by seed-and-vote. *Nucleic Acids Res* **41**, e108 (2013).
  - 650 17. T. W. Turowski, D. Tollervy, Transcription by RNA polymerase III: insights into  
651 mechanism and regulation. *Biochem Soc Trans* **44**, 1367-1375 (2016).
  - 652 18. R. J. White, Transcription by RNA polymerase III: more complex than we thought.  
653 *Nat Rev Genet* **12**, 459-463 (2011).
  - 654 19. A. Barski *et al.*, Pol II and its associated epigenetic marks are present at Pol III-  
655 transcribed noncoding RNA genes. *Nat Struct Mol Biol* **17**, 629-634 (2010).

- 656 20. D. Canella, V. Praz, J. H. Reina, P. Cousin, N. Hernandez, Defining the RNA  
657 polymerase III transcriptome: Genome-wide localization of the RNA polymerase  
658 III transcription machinery in human cells. *Genome Res* **20**, 710-721 (2010).
- 659 21. Z. Moqtaderi *et al.*, Genomic binding profiles of functionally distinct RNA  
660 polymerase III transcription complexes in human cells. *Nat Struct Mol Biol* **17**,  
661 635-640 (2010).
- 662 22. A. J. Oler *et al.*, Human RNA polymerase III transcriptomes and relationships to  
663 Pol II promoter chromatin and enhancer-binding factors. *Nat Struct Mol Biol* **17**,  
664 620-628 (2010).
- 665 23. D. Raha *et al.*, Close association of RNA polymerase II and many transcription  
666 factors with Pol III genes. *Proc Natl Acad Sci U S A* **107**, 3639-3644 (2010).
- 667 24. J. Perreault, J. P. Perreault, G. Boire, Ro-associated Y RNAs in metazoans:  
668 evolution and diversification. *Mol Biol Evol* **24**, 1678-1689 (2007).
- 669 25. D. H. Mathews, J. Sabina, M. Zuker, D. H. Turner, Expanded sequence  
670 dependence of thermodynamic parameters improves prediction of RNA  
671 secondary structure. *J Mol Biol* **288**, 911-940 (1999).
- 672 26. J. R. Brister, D. Ako-Adjei, Y. Bao, O. Blinkova, NCBI viral genomes resource.  
673 *Nucleic Acids Res* **43**, D571-577 (2015).
- 674 27. R. Hubley *et al.*, The Dfam database of repetitive DNA families. *Nucleic Acids*  
675 *Res* **44**, D81-89 (2016).
- 676

**A**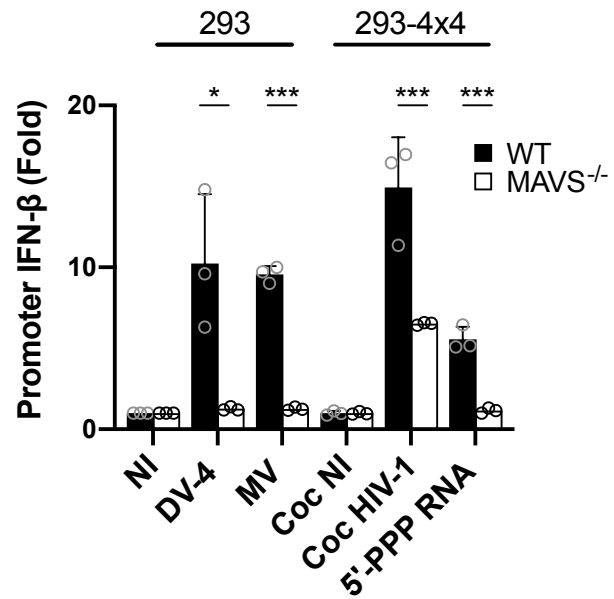**B**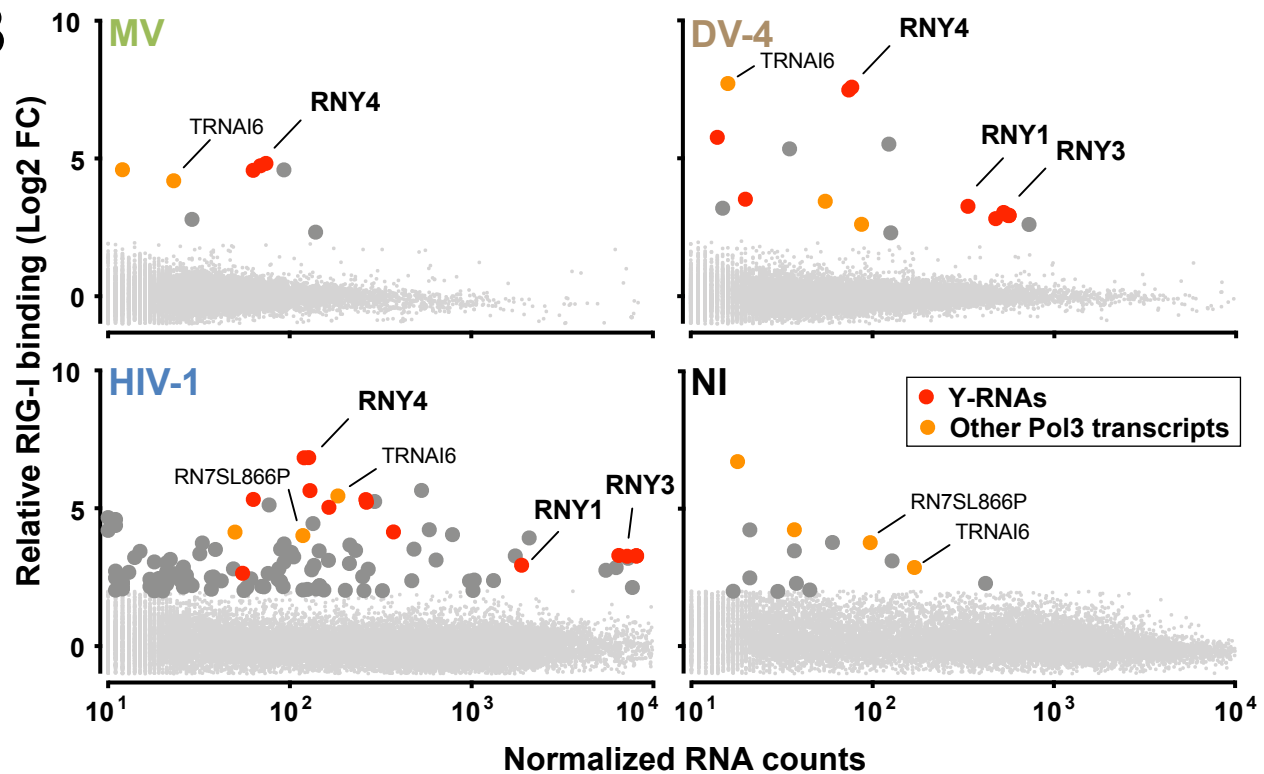**C**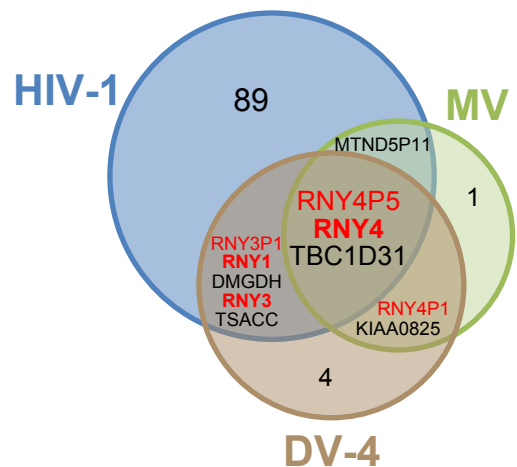**D**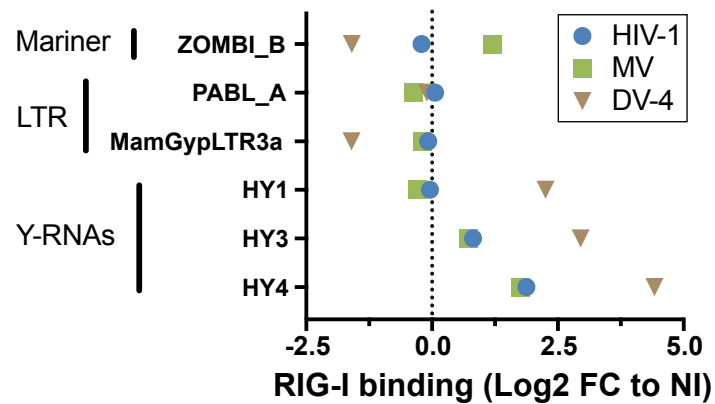

677 **Figure 1: A differential affinity screen identifies Y-RNAs and other POL3 RNAs as**  
678 **RIG-I ligands mobilizable during RNA virus infection.**

679 **A.** Promoter IFN- $\beta$ -luciferase reporter activity in WT or MAVS-/- (left) 293 cells infected  
680 with Measles virus (MV) or Dengue Virus 4 (DV-4) at MOI of 1 and 0.5 respectively, or  
681 (right) 293-4x4 cocultivated with HIV-1 infected MT4C5 at a ratio of MT4C5:293-4x4 of  
682 1:1. 5'-PPP is a short *in vitro* transcribed RNA RIG-I agonist transfected at a  
683 concentration of 10 ng/ml.

684 **B.** 24h post-infection with MV or DV-4, after coculture with HIV-1 infected MT4 or in non-  
685 infected (NI) control, sequencing reads were mapped to human genome Hg38.  
686 Differential analyses were performed between RIG-I/RNA and Cherry/RNA samples.  
687 Genes are represented following their normalized count in cellular RNA (x-axis) and  
688 their fold enrichment (log<sub>2</sub>) to RIG-I compared to Cherry control (y-axis) from averaging  
689 three independent replicates. Genes that showed a log<sub>2</sub>(FC)>2 and adj-pval<0.05 are  
690 represented with larger dot size. Among these, Pol3 transcripts are shown in orange  
691 and transcripts from Y-RNA families in red. Canonical Y-RNAs and Pol3 transcripts that  
692 show enrichment in more than 2 conditions (virus or NI) are specifically annotated.

693 **C.** Venn diagram representing genes specifically enriched to RIG-I compared to Cherry in  
694 any of MV, DV-4 or HIV-1 infected conditions, but absent in NI condition.

695 **D.** Families of repeats RNA that show specific affinity to RIG-I compared to Cherry in at  
696 least one infected or NI condition, computed according to their relative enrichment  
697 compared to NI.

698 **A.** Data representative of n=3 independent experiments. Bars show mean +/- s.e.m. of  
699 technical triplicates. Student's t-test \*p<0.05; \*\*\*p< 0.001. **B-D.** Enrichment calculated  
700 from the mean of n=3 infection/RLR-purification/sequencing experiments.



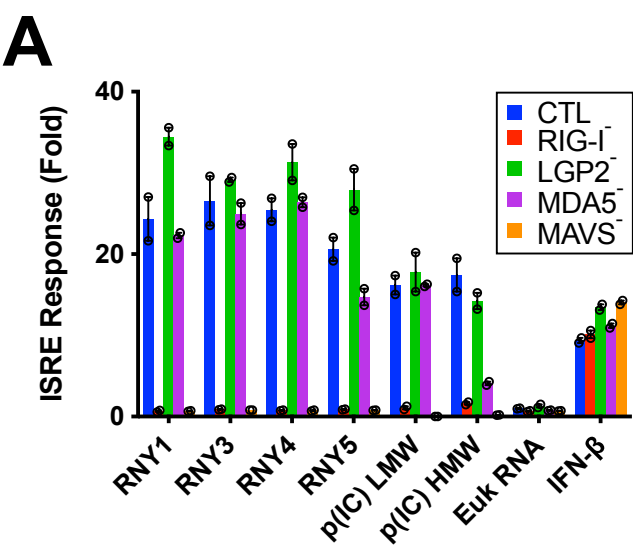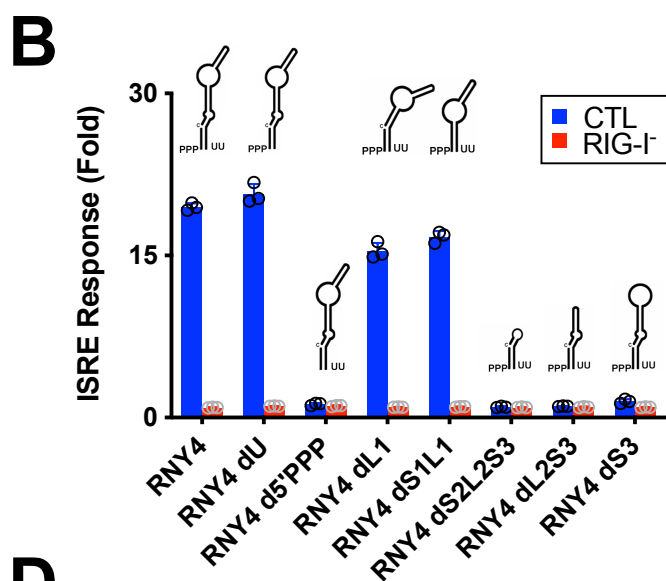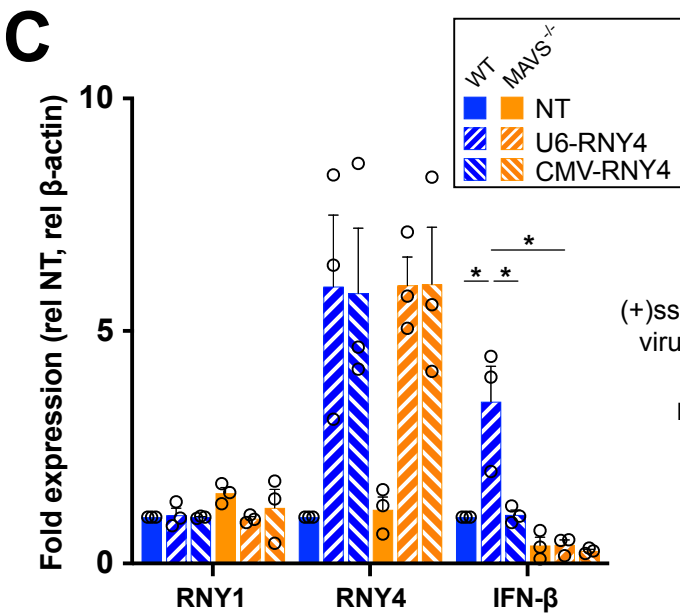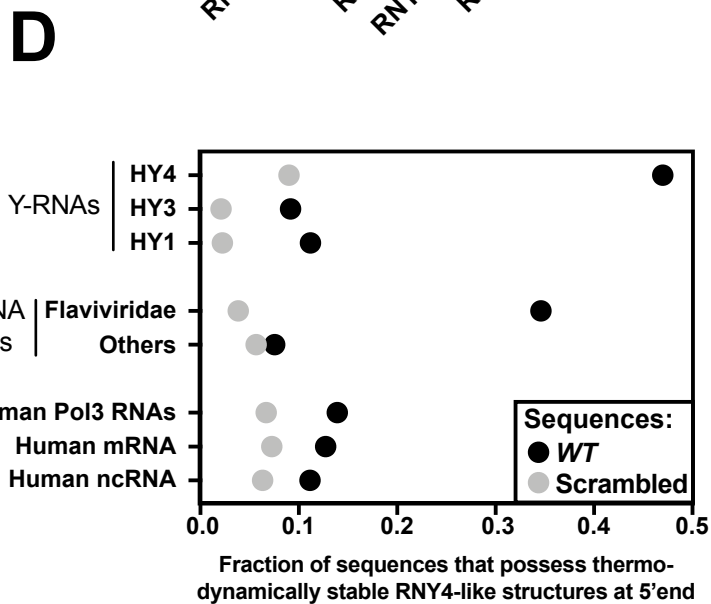

701 **Figure 2. RNY4 RIG-I agonist activity is conferred by RNA 5'-PPP moieties and viral-**  
702 **mimicking specific secondary structure.**

703 **A.** Promoter ISRE-luciferase reporter activity in HAP1 cells WT or ko for each individual  
704 RLR or downstream adaptor MAVS, transfected with 30ng/ml of IVT Y-RNA (RNY1,  
705 RNY3-5), 10ng/ml poly(I:C) low or high molecular weight (p(I:C) LMW/HMW), 30ng/ml  
706 of total eukaryotic RNA or treated with 100U/ml recombinant IFN- $\beta$ .

707 **B.** Promoter ISRE-luciferase reporter activity in HAP1 cells WT or RIG-I ko transfected  
708 with 30ng/ml IVT RNY4 full length or lacking specific substructure (Fig. S2B). RNY4  
709 d5'PPP: RNY4 was additionally pretreated with alkaline phosphatase to remove 5'  
710 triphosphate extremity.

711 **C.** RNY1, RNY4 and IFN- $\beta$  RNA levels measured by qPCR after transfection of 293T *WT*  
712 or *MAVS<sup>-/-</sup>* with plasmids coding for RNY4 sequence and supplemented with a plasmid  
713 coding for RIG-I. U6-RNY4: p2RZ plasmid encoding full length RNY4 downstream of  
714 Pol3 U6 promoter with 3' ribozyme sequence. CMV-RNY4: same plasmid with Pol2  
715 CMV promoter instead of U6. NT: empty plasmid.

716 **D.** Probability of sequence folding along RNY4 secondary structure in the 5' end of each  
717 transcript, for dataset of human Y-RNAs repeat families, (+)ssRNA viruses genomes  
718 (*Flaviviridae* or non-*Flaviviridae*), or human non coding RNA (ncRNA), mRNAs and  
719 Pol3 transcripts, compared to average probability of the same sequences randomly  
720 scrambled.

721 **A-B.** Data representative of n=3 independent experiments. Bars show mean +/- s.e.m. of  
722 technical duplicates. **C.** Bars show mean +/- s.e.m of n=3 independent experiments.  
723 Student's t-test \*p<0.05.

**A**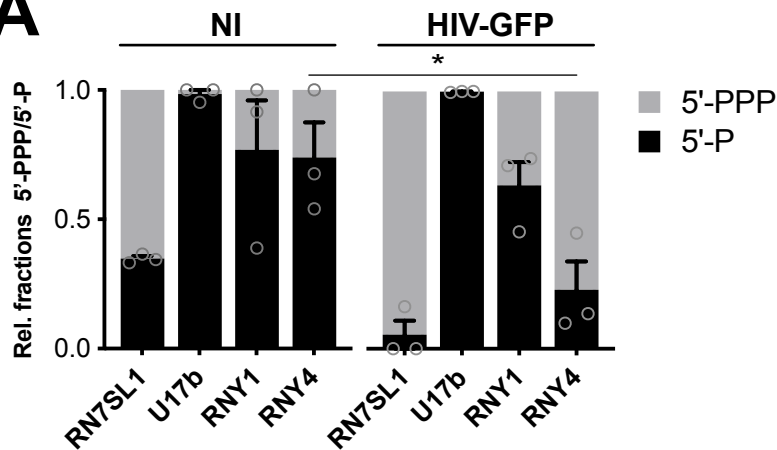**B**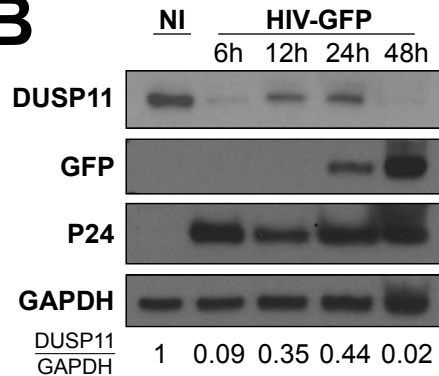**C**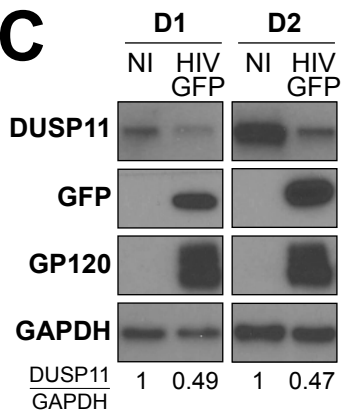**D**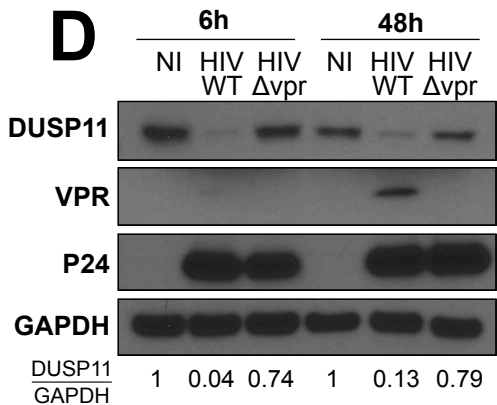**E**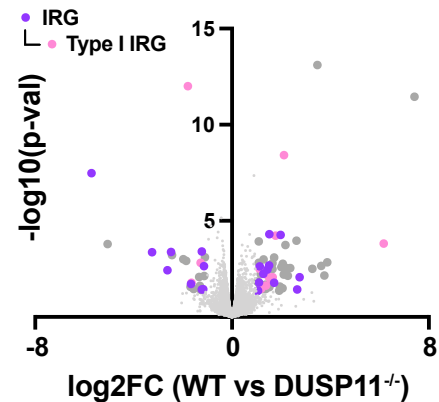

724 **Figure 3: HIV-1 VPR-dependent downregulation of DUSP11 licenses endogenous**  
725 **Pol3-transcribed RNAs immunogenicity in infected cells.**

726 **A.** Ratio of 5'-PPP and 5'-P-bearing RNY1 and RNY4 in Jurkat cells 48h post infection  
727 with HIV-GFP or in non-infected (NI) Jurkat. Relative 5'-PPP/5'-P RNA levels were  
728 determined through differential enzyme digestion followed by qPCR analysis relative to  
729  $\beta$ -actin mRNA. RN7SL1 and U17b are 5'-PPP and 5'-P RNA controls, respectively.

730 **B.** DUSP11 protein levels measured at different times points after Jurkat T cells infection  
731 with HIV-GFP.

732 **C.** DUSP11 protein levels measured in NI or HIV-GFP-infected CD4 primary cells from 2  
733 different donors 48h post-infection. CD4 T cells were beads-sorted from total PBMC  
734 and activated with PHA for 72h prior to infection with HIV-GFP. 48h post-infection,  
735 productively infected cells were FACS-sorted according to GFP expression.

736 **D.** DUSP11 protein levels measured at 6h and 48h after Jurkat T cells infection with *WT*  
737 NL4.3 HIV-1 or the same clone deleted for VPR protein.

738 **E.** Volcano-plot of differential expressed genes in 3 *WT* or *DUSP11*<sup>-/-</sup> Jurkat clones. IFN  
739 or IFN-I regulated genes (IRG) (annotation according to interferome database) are  
740 labelled in purple (dark and light, respectively).

741 **A.** Bars show mean +/- s.e.m. of n=3 independent experiments. Student's t-test \*p<0.05.

742 **B-D.** Western Blot representative of n=3 independent experiments. **B-D** Numbers at the  
743 bottom indicate semi-quantification of relative DUSP11/GAPDH levels normalized to NI  
744 conditions.

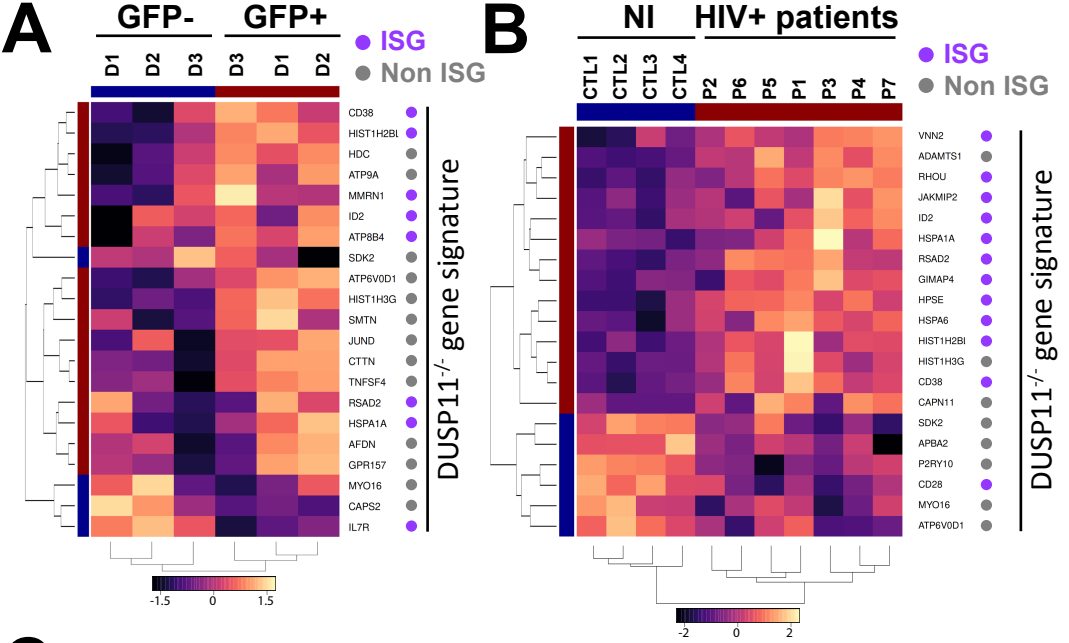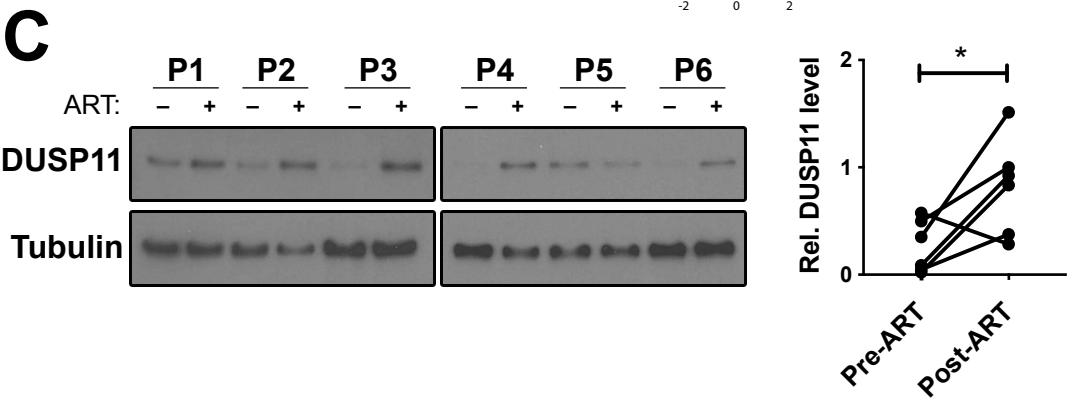

745 **Figure 4. DUSP11 downregulation and subsequent transcriptional response is**  
746 **observed in HIV-1 infected patients.**

747 **A.** Hierarchical clustering and heatmap based on genes from DUSP11<sup>-/-</sup> gene signature,  
748 differentially expressed between primary cells from 3 different donors, productively  
749 (GFP+), or non-productively (GFP-) infected with HIV-GFP.

750 **B.** Hierarchical clustering and heatmap based on genes from DUSP11<sup>-/-</sup> gene signature,  
751 differentially expressed between CD4 T cells from non-infected patients and acutely  
752 infected non-treated HIV+ patients.

753 **C.** Western blot (left) and relative quantification (right) showing DUSP11 level in CD4 T  
754 cells from HIV+ patients prior and after anti-retroviral treatment. Paired t-test \*p<0.05.

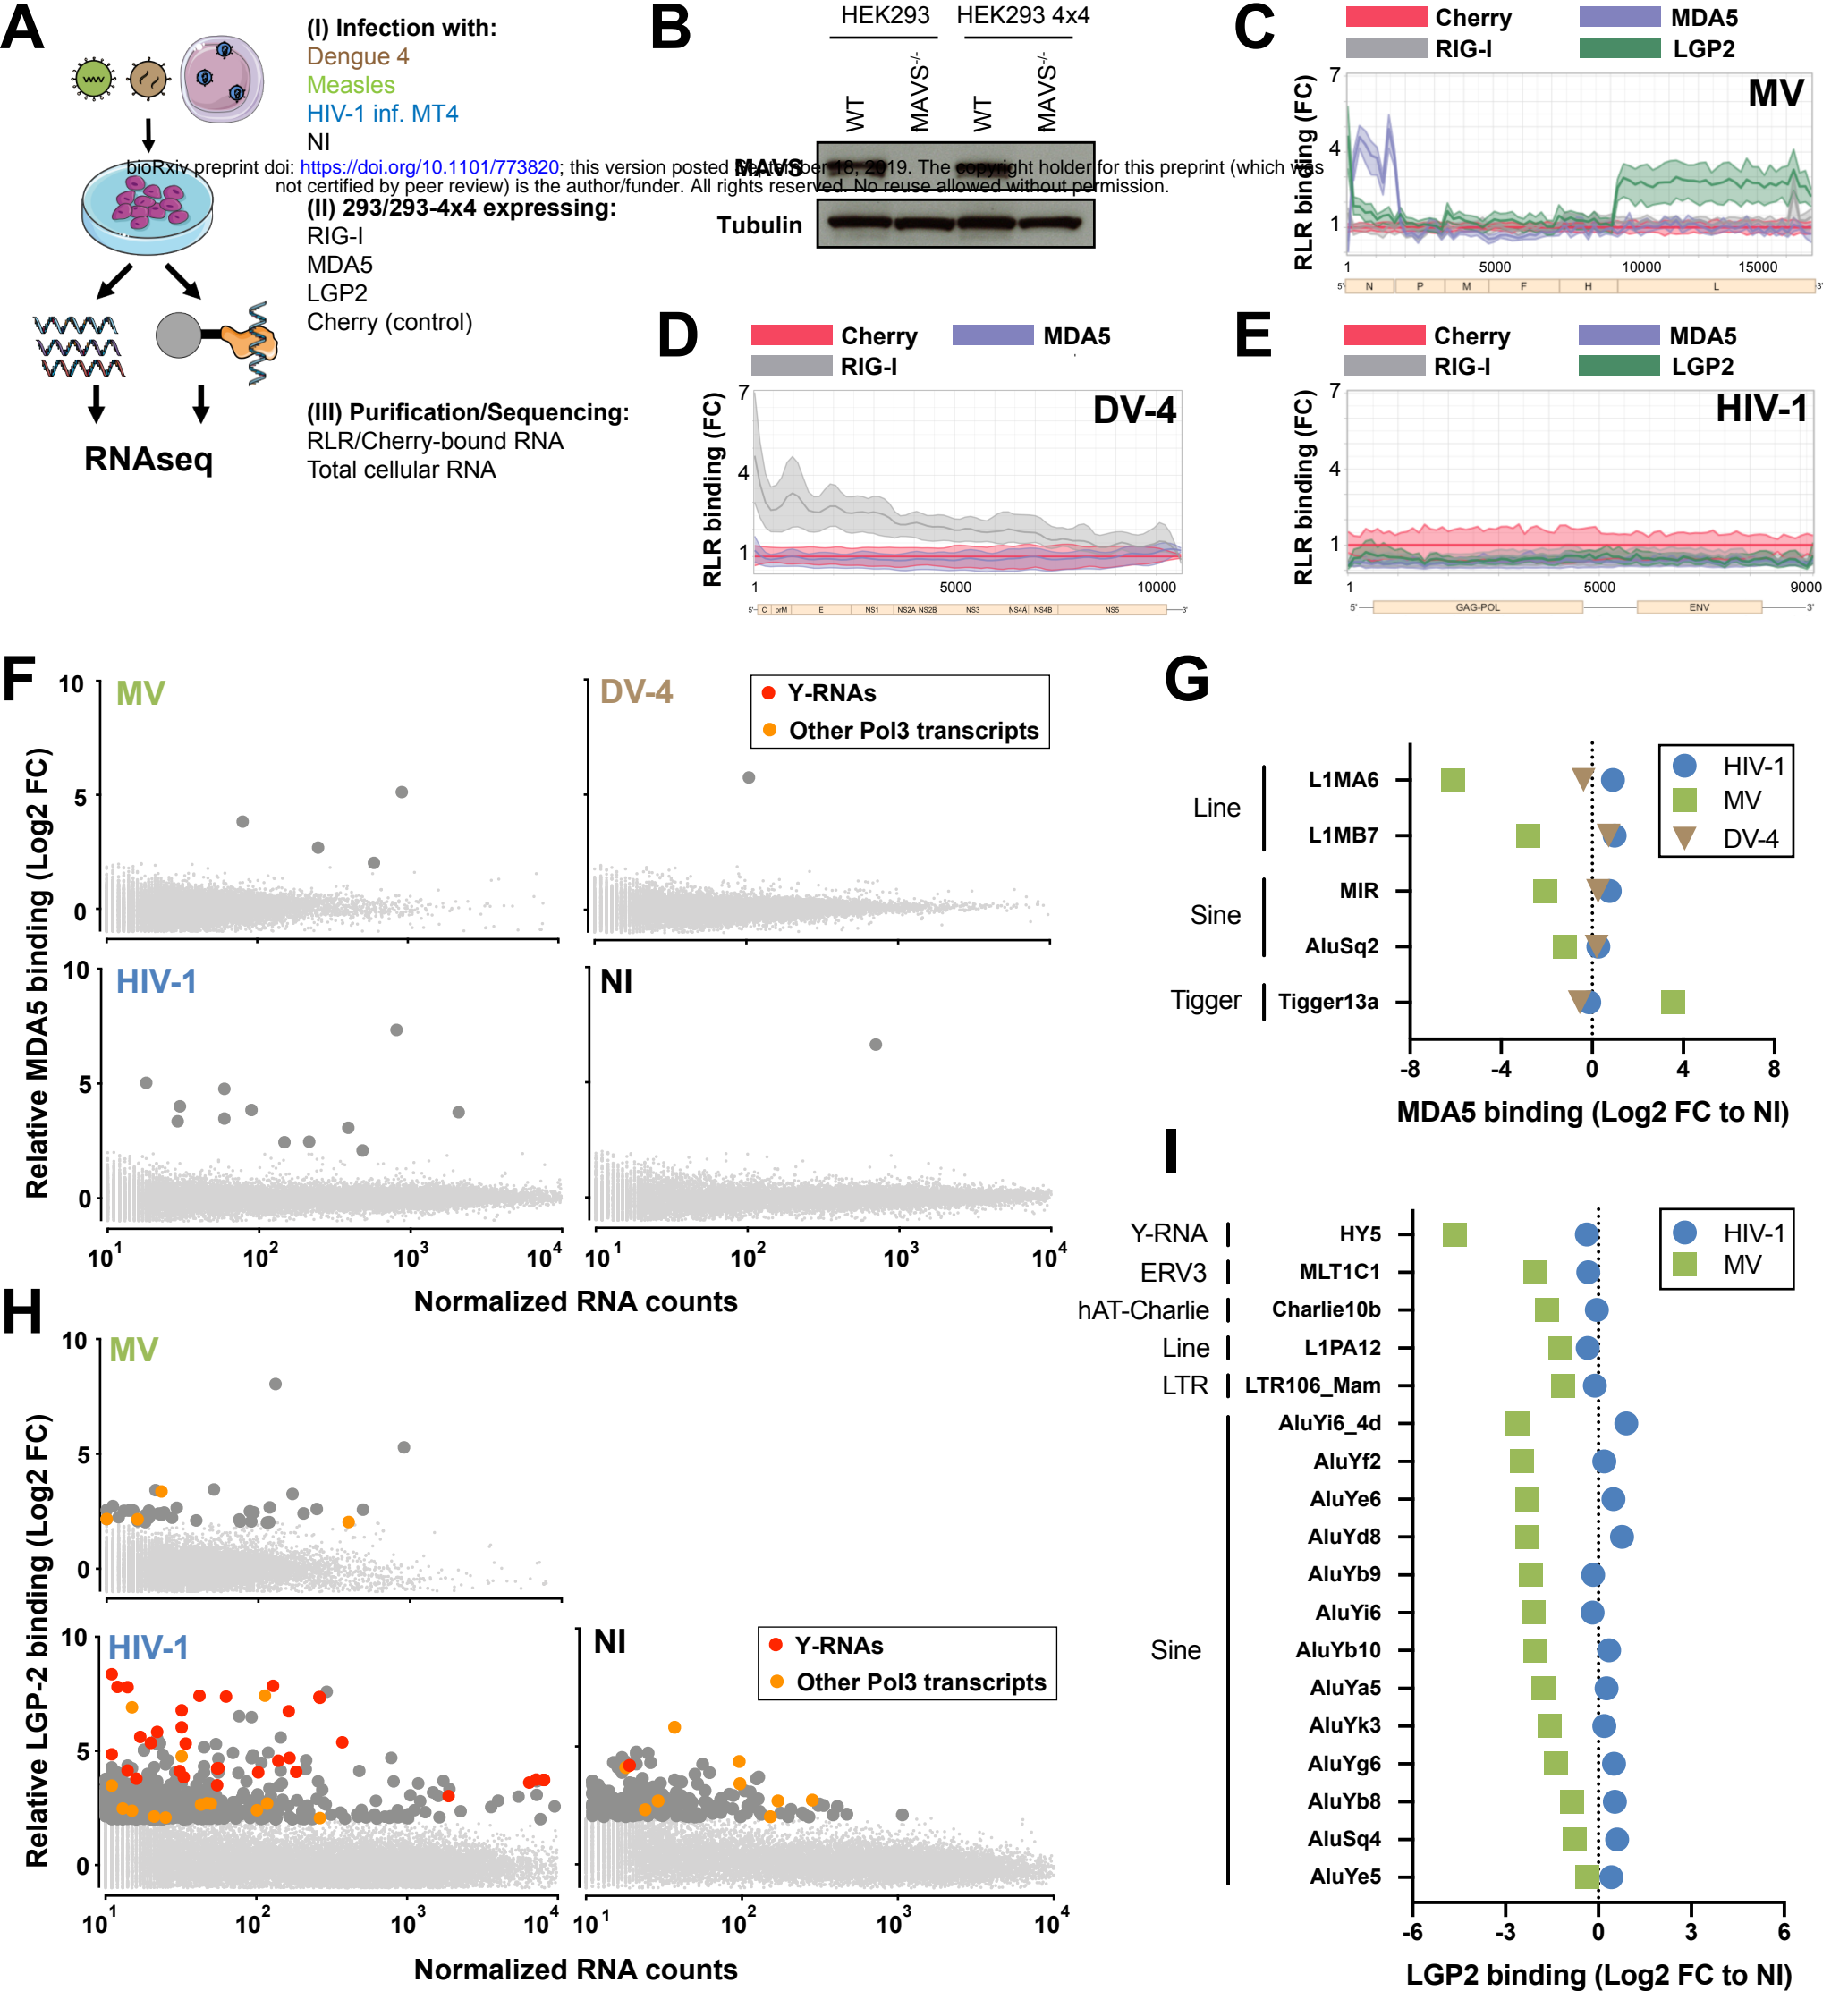

755 **Supplementary Figure 1**

- 756 **A.** *Experimental approach* – 293 or 293-4x4 were engineered to stably expressed  
757 STrEP-tagged RLR receptors RIG-I, MDA5 or LGP2, or the non-RNA binding control  
758 Cherry. (I) 293 were infected with Measles Virus (MV) or Dengue Virus 4 (DV-4).  
759 293-4x4 cells were cocultivated with HIV-1 infected MT4, non-infected cells were  
760 used as controls. (II) 24h after infection/coculture, cells were lysed, RLR receptors  
761 and Cherry protein were purified using STrEP-tag affinity and corresponding RNA  
762 fractions were isolated. (III) Total cellular RNA and RLR/Cherry-bound RNA fractions  
763 were subjected to total RNAseq and reads aligned on viral genomes (MV Schwarz  
764 strain; DV-4 Dominica; HIV-1 NL4.3) and human genome (HG38).
- 765 **B.** Western Blot showing complete MAVS depletion in 293 and 293-4x4 MAVS<sup>-/-</sup> cells.
- 766 **C-E.** 24h post-infection with MV (**C**) or DV-4 (**D**), after coculture with HIV-1 infected MT4  
767 (**E**), total cellular RNA and RLR/RNA purified complexes are subjected to strand-  
768 specific NGS analysis. Sequencing reads are mapped to MV (**C**) or DV-4 (**D**) or HIV-  
769 1 (**E**) genome after normalization based on total RNA samples. Differential  
770 enrichment analyses were performed between RLR/RNA and Cherry/RNA samples.  
771 The distribution of normalized read coverage matching each virus genome is  
772 represented along the (x-axis), and showing the fold enrichment on beads between  
773 RIG-I, MDA5 (**C-E**), LGP2 (**C,E**) compared to Cherry control. The curves were  
774 obtained from averaging read coverage of three independent experiments. The  
775 corresponding data were previously described in (15,16).
- 776 **F.** 24h after infection with MV or DV-4, after coculture with HIV-1 infected MT4C5 or in  
777 NI control, sequencing reads were mapped to human genome. Differential  
778 enrichment analyses were performed between MDA5/RNA and Cherry/RNA  
779 samples. Genes are represented following their normalized count in cellular RNA (x-  
780 axis) and their fold enrichment (log<sub>2</sub>) to MDA5 compared to Cherry control (y-axis)  
781 from averaging three independent replicates. Genes that showed a log<sub>2</sub>(FC)>2 and  
782 adj-pval<0.05 are represented with larger dot size. Among these, RNA Pol3  
783 transcripts are shown in orange and transcripts from Y-RNA families in red.
- 784 **G.** Families of repeats RNA that show specific affinity to MDA5 compared to Cherry in  
785 at least one infected or NI condition, computed according to their relative enrichment  
786 compared to NI.
- 787 **H.** 24h after infection with MV or after coculture with HIV-1 infected MT4 or in NI control,  
788 sequencing reads were mapped to human genome. Differential enrichment analyses  
789 were performed between LGP2/RNA and Cherry/RNA samples. Genes are  
790 represented following their normalized count in cellular RNA (x-axis) and their fold  
791 enrichment (log<sub>2</sub>) to LGP2 compared to Cherry control (y-axis) from averaging three  
792 independent replicates. Genes that showed a log<sub>2</sub>(FC)>2 and adj-pval<0.05 are  
793 represented with larger dot size. Among these, Pol3 transcripts are shown in orange  
794 and transcripts from Y-RNA families in red.
- 795 **I.** Families of repeats RNA that show specific affinity to LGP2 compared to Cherry in  
796 at least one infected or NI condition, computed according to their relative enrichment  
797 compared to NI.
- 798
- 799 **B.** Western Blot representative of n=3 independent experiments. **C-I.** Enrichment  
800 calculated from the mean of n=3 infection/RLR-purification/sequencing experiments.



**A**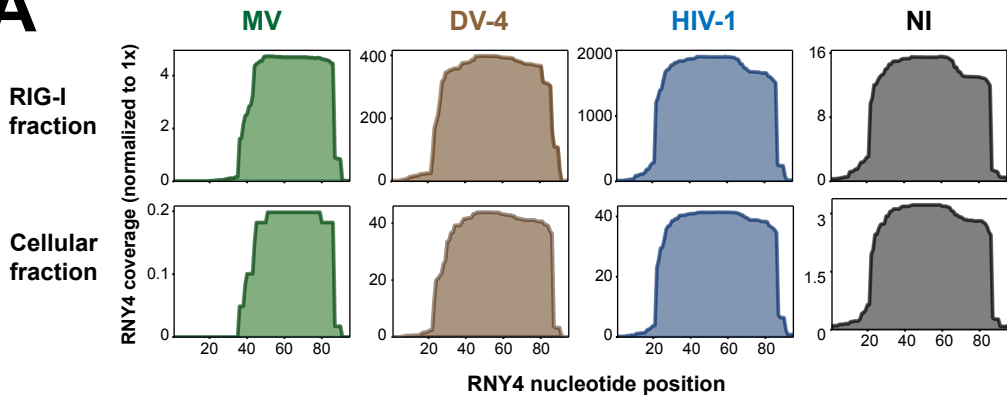**B**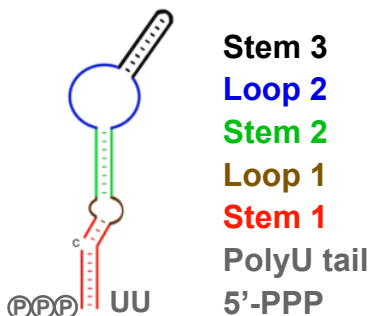**C**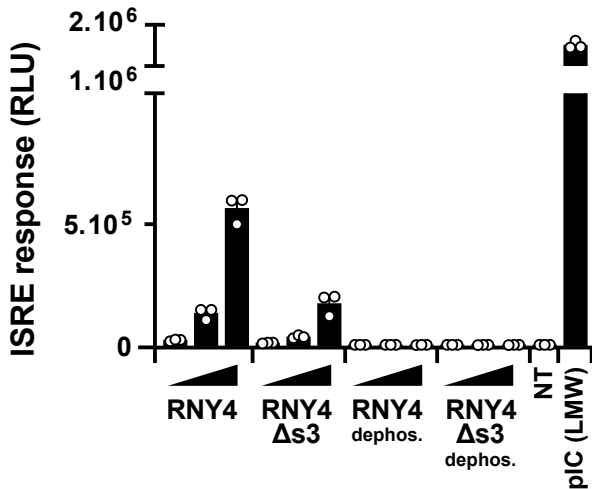

801 **Supplementary Figure 2**

802 **A.** RNAseq normalized read coverage of RNY4 gene in RIG-I isolated fractions (top row)  
803 and cellular fractions (bottom row) in the different infection conditions.

804 **B.** Schematic secondary structures (as described in 18) of RNY4 detailing the different  
805 molecular substructures analyzed in this work.

806 **C.** Luciferase reporter activities showing ISRE-luciferase response from STING-37 cells  
807 transfected with 5-10-20ng/ml of different RNY4 subsets. RNY4 and RNY4dS3 RNAs  
808 were generated through *in vitro* transcription from a modified p2RZ plasmid where  
809 RNY4 or RNY4dS3 sequences are cloned downstream of a T7 promoter and upstream  
810 of a 3' ribozyme sequence that generates discrete 3' ends. Both RNAs were  
811 subsequently treated with Alkanine Phosphatase to remove their 5'-PPP moieties.

812  
813 **C.** Data representative of n=3 independent experiments. Bars show mean +/- s.e.m. of  
814 technical triplicates.

**A**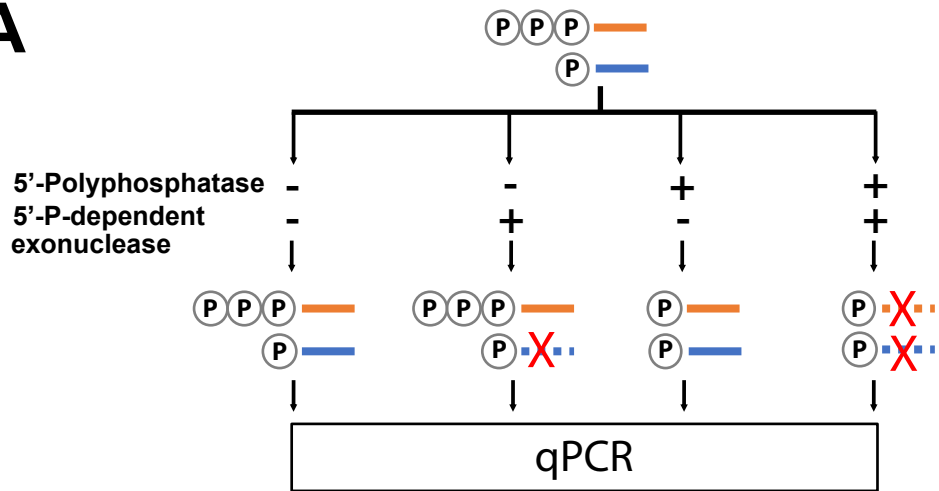**B**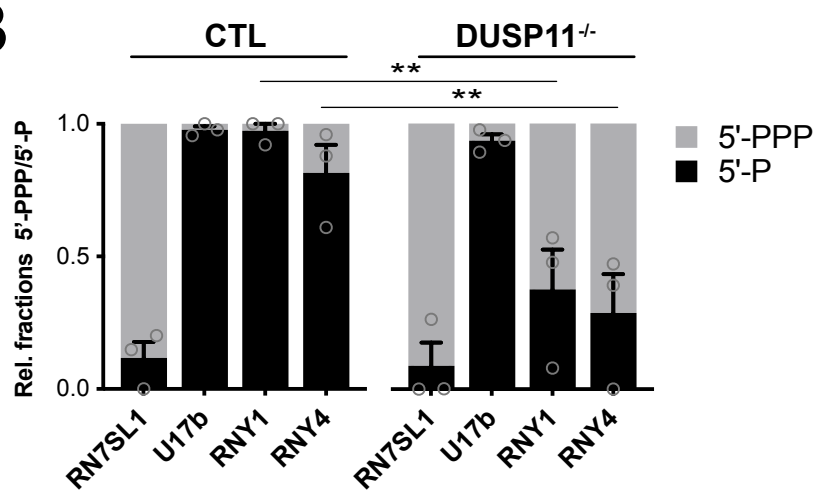**C**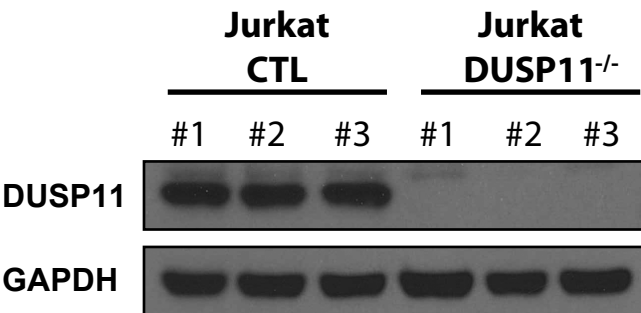**D**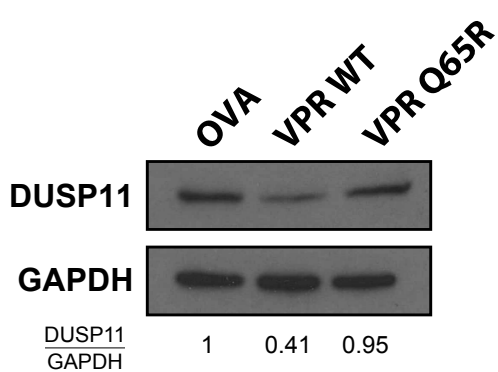**E**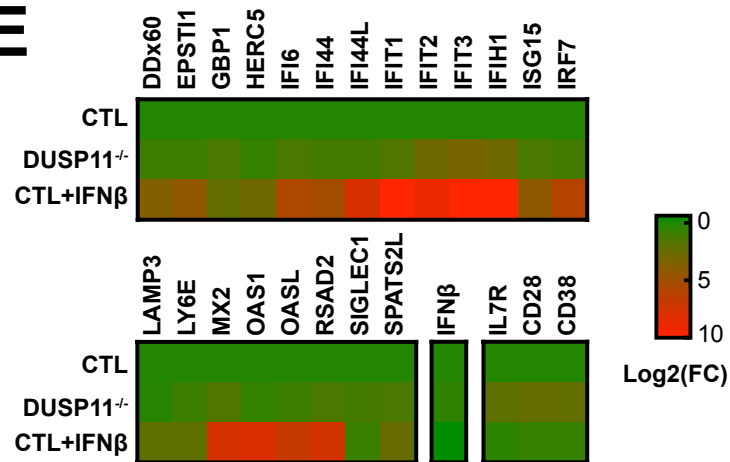

815 **Supplementary Figure 3**

- 816 **A.** Summary schematic of differential enzymatic digestion. Total cellular RNAs were  
817 isolated and treated with either 5'-polyphosphatase, 5'-P-dependent exonuclease  
818 or both consecutively. Resulting RNAs were purified, reverse-transcribed and their level  
819 measured by qPCR. RN7SL1 and U17b served as 5'-PPP and 5'-P controls,  
820 respectively.
- 821 **B.** Ratio of 5'-PPP and 5'-P-bearing RNY1 and RNY4 in control or DUSP11<sup>-/-</sup> Jurkat T  
822 cells. Relative 5'-PPP/5'-P RNA levels were determined through differential enzyme  
823 digestion followed by qPCR relative to  $\beta$ -actin mRNA. RN7SL1 and U17b served as 5'-  
824 PPP and 5'-P RNA controls, respectively.
- 825 **C.** Western Blot showing complete DUSP11 depletion in Jurkat DUSP11<sup>-/-</sup> clones.
- 826 **D.** Western Blot showing DUSP11 depletion in Jurkat cells 72h after transduction with  
827 lentiviruses coding for ovalbumin control (OVA), HIV-1 VPR *WT* or a VPR(Q65R)  
828 mutant, defective for DCAF1 binding.
- 829 **E.** Heatmap of qPCR values measuring expression level of a panel of IFN-I stimulated  
830 genes and markers of T cells activation (CD28, CD38, IL7R) in Jurkat control,  
831 DUSP11<sup>-/-</sup>, or control treated overnight with recombinant IFN- $\beta$ . Expression levels are  
832 normalized to  *$\beta$ -actin* mRNA levels and to Jurkat control.
- 833
- 834 **B.** Bars show mean  $\pm$  s.e.m. of 3 control and 3 DUSP11<sup>-/-</sup> Jurkat clones. Student's t-test  
835 \*\* $p < 0.01$  **C.** Western Blot representative of  $n=2$  independent experiments. **D.** Western  
836 Blot representative of 3 independent experiments. Numbers at the bottom indicate semi-  
837 quantification of relative DUSP11/GAPDH levels normalized to control condition. **E.** Heat  
838 map show mean of 3 controls and 3 DUSP11<sup>-/-</sup> Jurkat clones.



839 **Supplementary Figure 4**

840 Schematic of the proposed mechanism for the contribution of Pol3-transcribed  
841 endogenous RNAs in the activation of RIG-I/MAVS during HIV-1 infection.

842
